# Supplementary material for: Cross-species genetic screens identify transglutaminase 5 as a regulator of polyglutamine-expanded ataxin-1
Source: JCI journal article supplement (doi:10.1172/jci156616), 2022-05-01

**Supplemental Table 6. Interrogation of the 22 genes whose knockdown reduced ATXN1 in SCA1 patient iPSC-derived neurons**

| Gene name | Library | Selected | Paralogs: positive ATXN1 regulators | <i>Drosophila</i> phenotype rescue |       | Validation in the patient-derived neurons by overexpression |
|-----------|---------|----------|-------------------------------------|------------------------------------|-------|-------------------------------------------------------------|
|           |         |          |                                     | Eye                                | Motor |                                                             |
| HDGFRP3   | CH      |          |                                     |                                    |       |                                                             |
| JADE2     | CH      |          |                                     |                                    |       | X                                                           |
| RAD54B    | CH      |          |                                     |                                    | X     |                                                             |
| POLA2     | EZ      |          |                                     |                                    | X     |                                                             |
| TGM5      | EZ      | X        | F13A1, TGM1, TGM2, TGM3, TGM6       | X                                  | X     | X (TGM2/6)                                                  |
| HELQ      | EZ      |          |                                     |                                    |       | X                                                           |
| QRFPR     | GP      |          |                                     | X                                  | X     |                                                             |
| MRGPRE    | GP      |          |                                     |                                    |       |                                                             |
| GABRA1    | IC      |          |                                     | X                                  | X     |                                                             |
| CATSPER2  | IC      |          |                                     |                                    | X     |                                                             |
| SLC39A11  | TP      |          |                                     | X                                  | X     |                                                             |
| SLCO1B3   | TP      |          |                                     |                                    |       |                                                             |
| DNAJB2    | UB      |          |                                     |                                    | X     | X                                                           |
| LBP       | OT      |          |                                     |                                    |       |                                                             |
| PLP2      | OT      |          |                                     |                                    |       | X                                                           |
| SEC62     | OT      |          |                                     |                                    |       |                                                             |
| TEKT4     | OT      |          |                                     |                                    |       |                                                             |
| IL1B      | OT      |          |                                     |                                    |       | X                                                           |
| MUC2      | OT      |          |                                     |                                    |       |                                                             |
| IRAK1     | KP      | X        | IRAK2, IRAK3, IRAK4                 | X                                  |       | X                                                           |
| SRPK3     | KP      | X        | SRPK1, SRPK2                        | X                                  |       | X                                                           |
| STK16     | KP      | X        |                                     | X                                  | X     | X                                                           |

CH: chromatin; EZ: enzyme; GP: GPCR; IC: ion channel; TP: transporter; UB: ubiquitin; OT: others; KP: kinase/phosphatase; Selected: genes selected for *in vivo* knockdown in the SCA1 mouse brain. The knockdown of targets except for LBP, TEKT4 and MUC2 were confirmed.

## Supplemental Figure 1

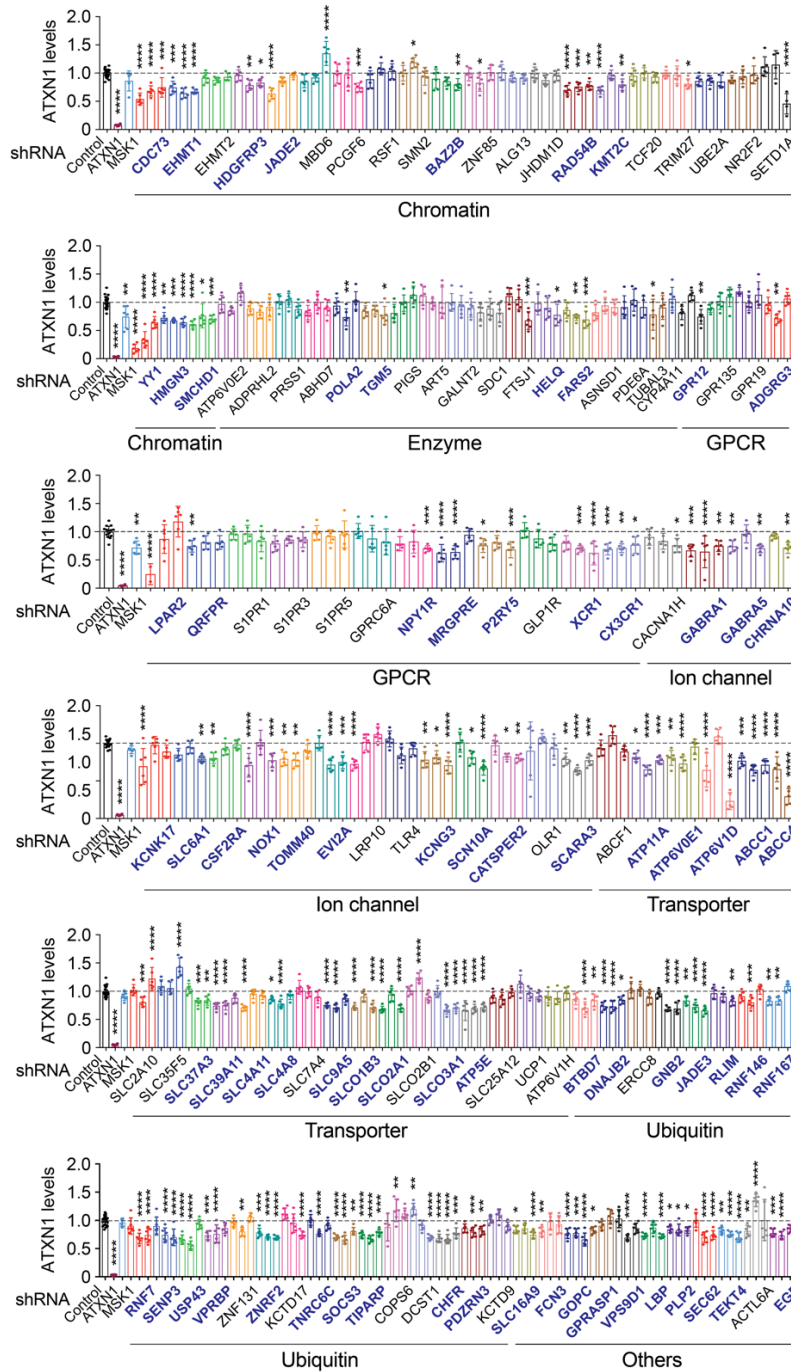

**Supplemental Figure 1. ATXN1[82Q] ELISA results after knockdown of 156 genes in ATXN1 reporter cells.** Individual bars display ATXN1 levels of each sample treated with different shRNAs. Genes whose names are colored in blue were selected for the next validations. The library in which individual gene belongs to is represented under each graph. Error bar:  $\pm$ SD, \* $p < 0.05$ , \*\* $p < 0.01$ , \*\*\* $p < 0.001$ , \*\*\*\* $p < 0.0001$ , One-way ANOVA, post-hoc: Dunnett's test.

**Supplemental Figure 2**

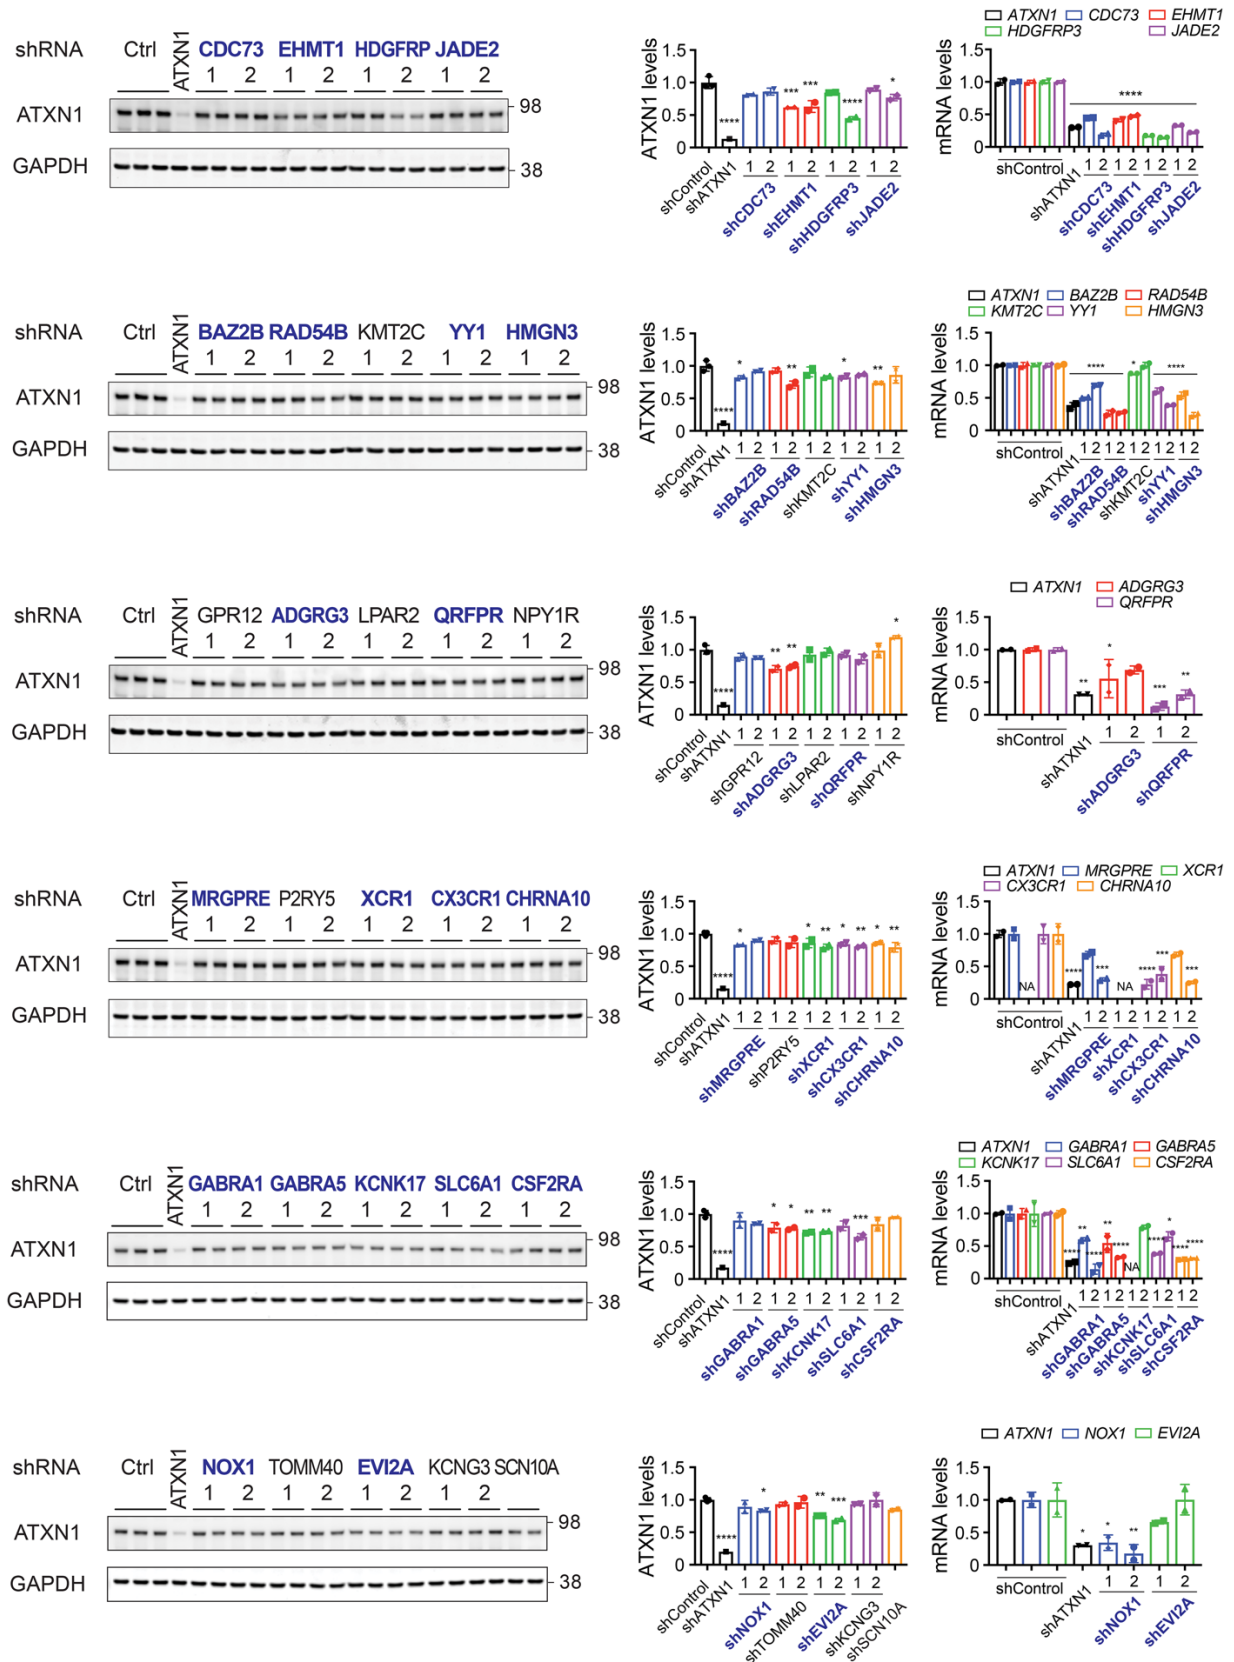

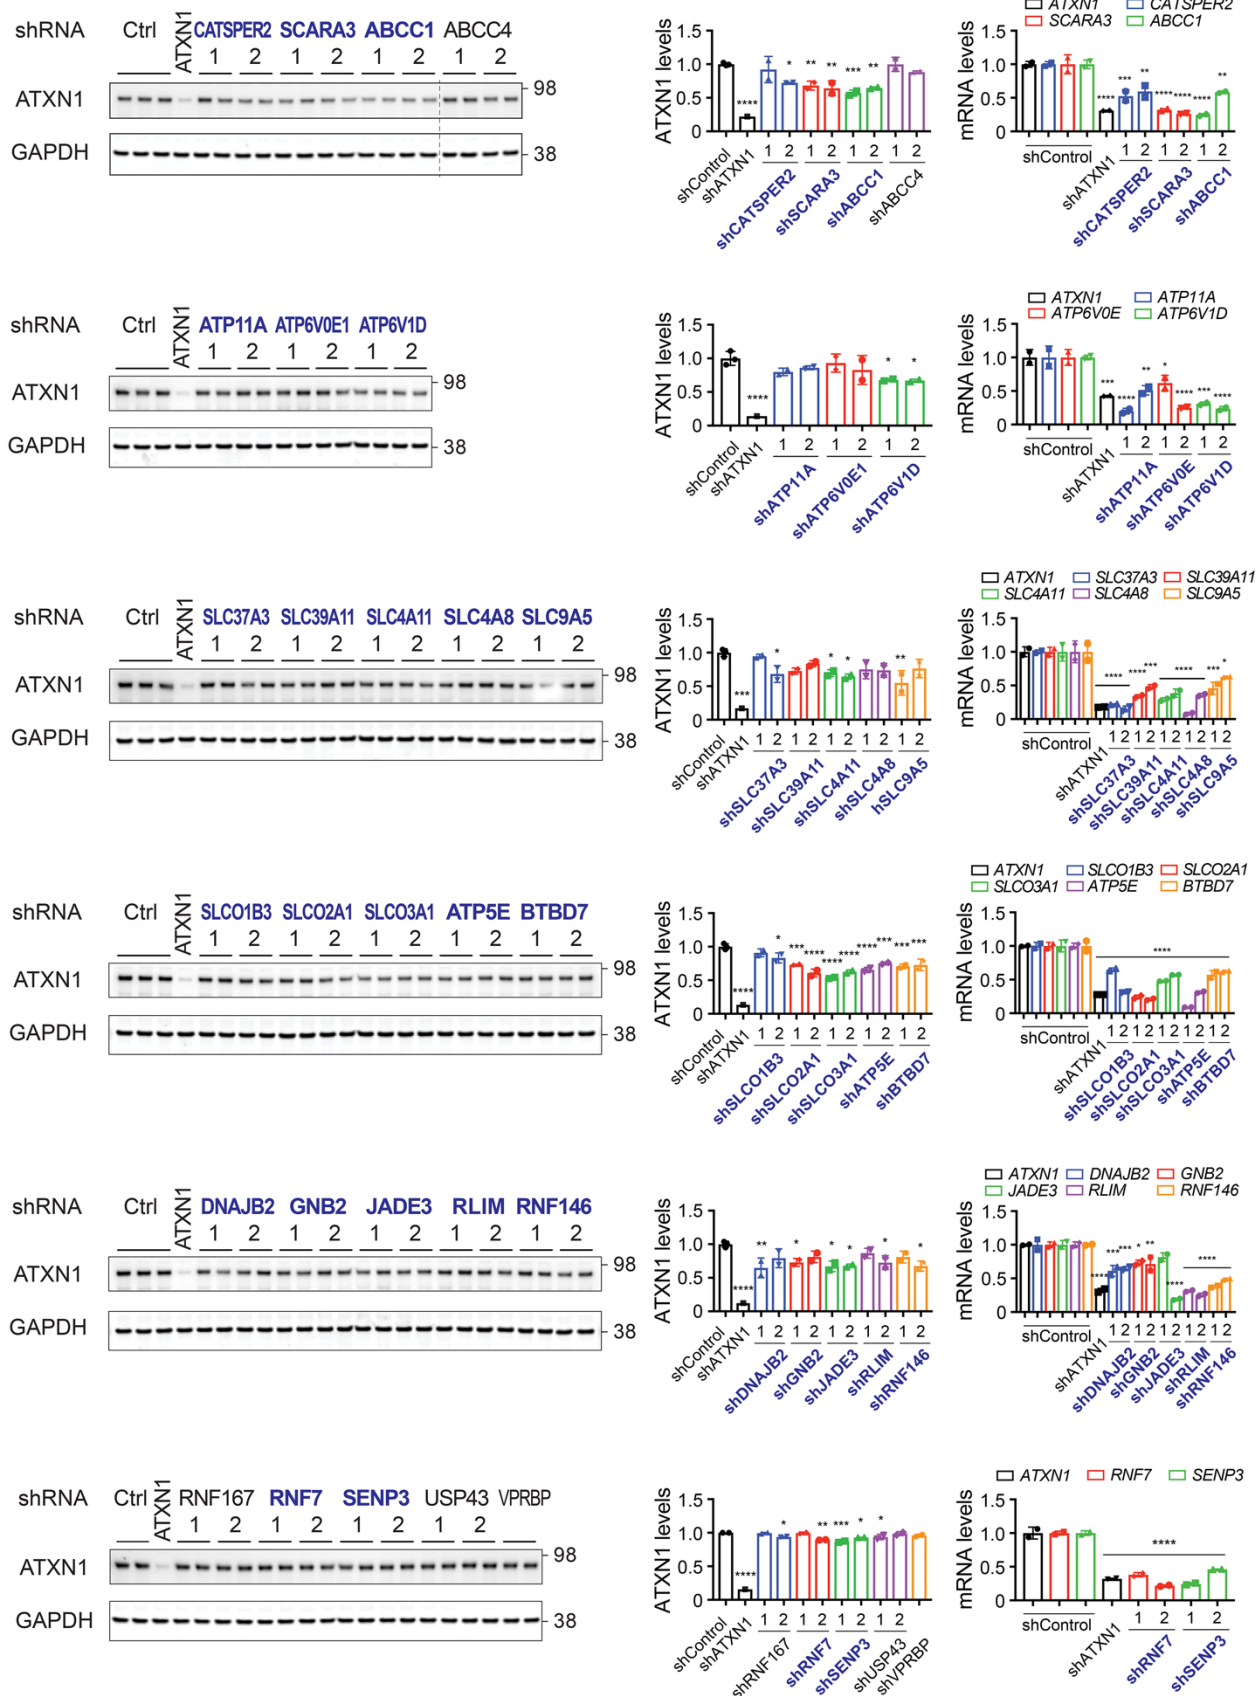



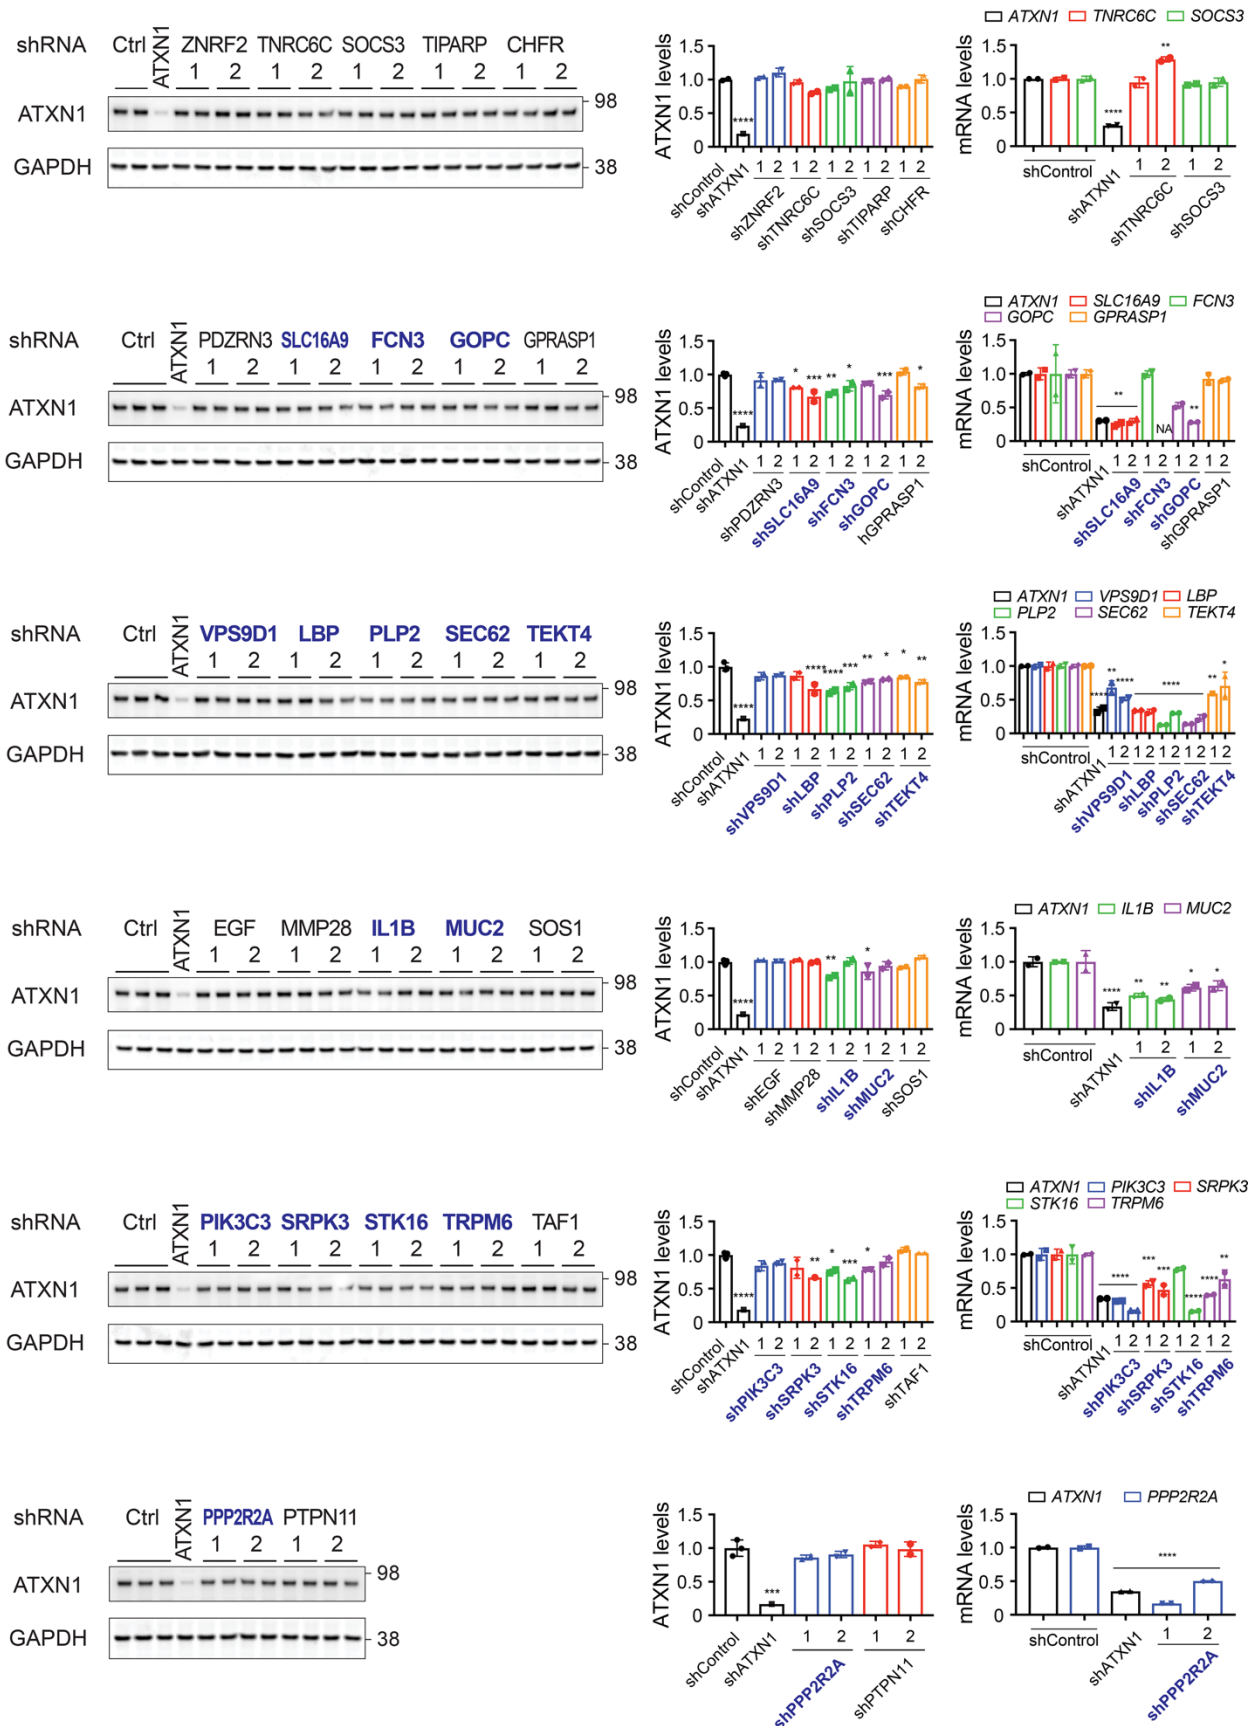

**Supplemental Figure 2. Validation of candidate ATXN1 regulators in wild-type Daoy cells.** Western blot analysis of endogenous ATXN1 and qRT-PCR results of target genes after knockdown of 94 genes. Left graphs: densitometry of ATXN1 levels, right graphs: mRNA levels of genes targeted by each shRNA. Genes whose names are colored in blue were selected for the next validations. qPCR was performed for only the genes that show decrease of ATXN1 protein levels. Error bar:  $\pm$ SD, \* $p < 0.05$ , \*\* $p < 0.01$ , \*\*\* $p < 0.001$ , \*\*\*\* $p < 0.0001$ , One-way ANOVA, post-hoc: Dunnett's test for the left graphs; Tukey's test for the right graphs.

## Supplemental Figure 3

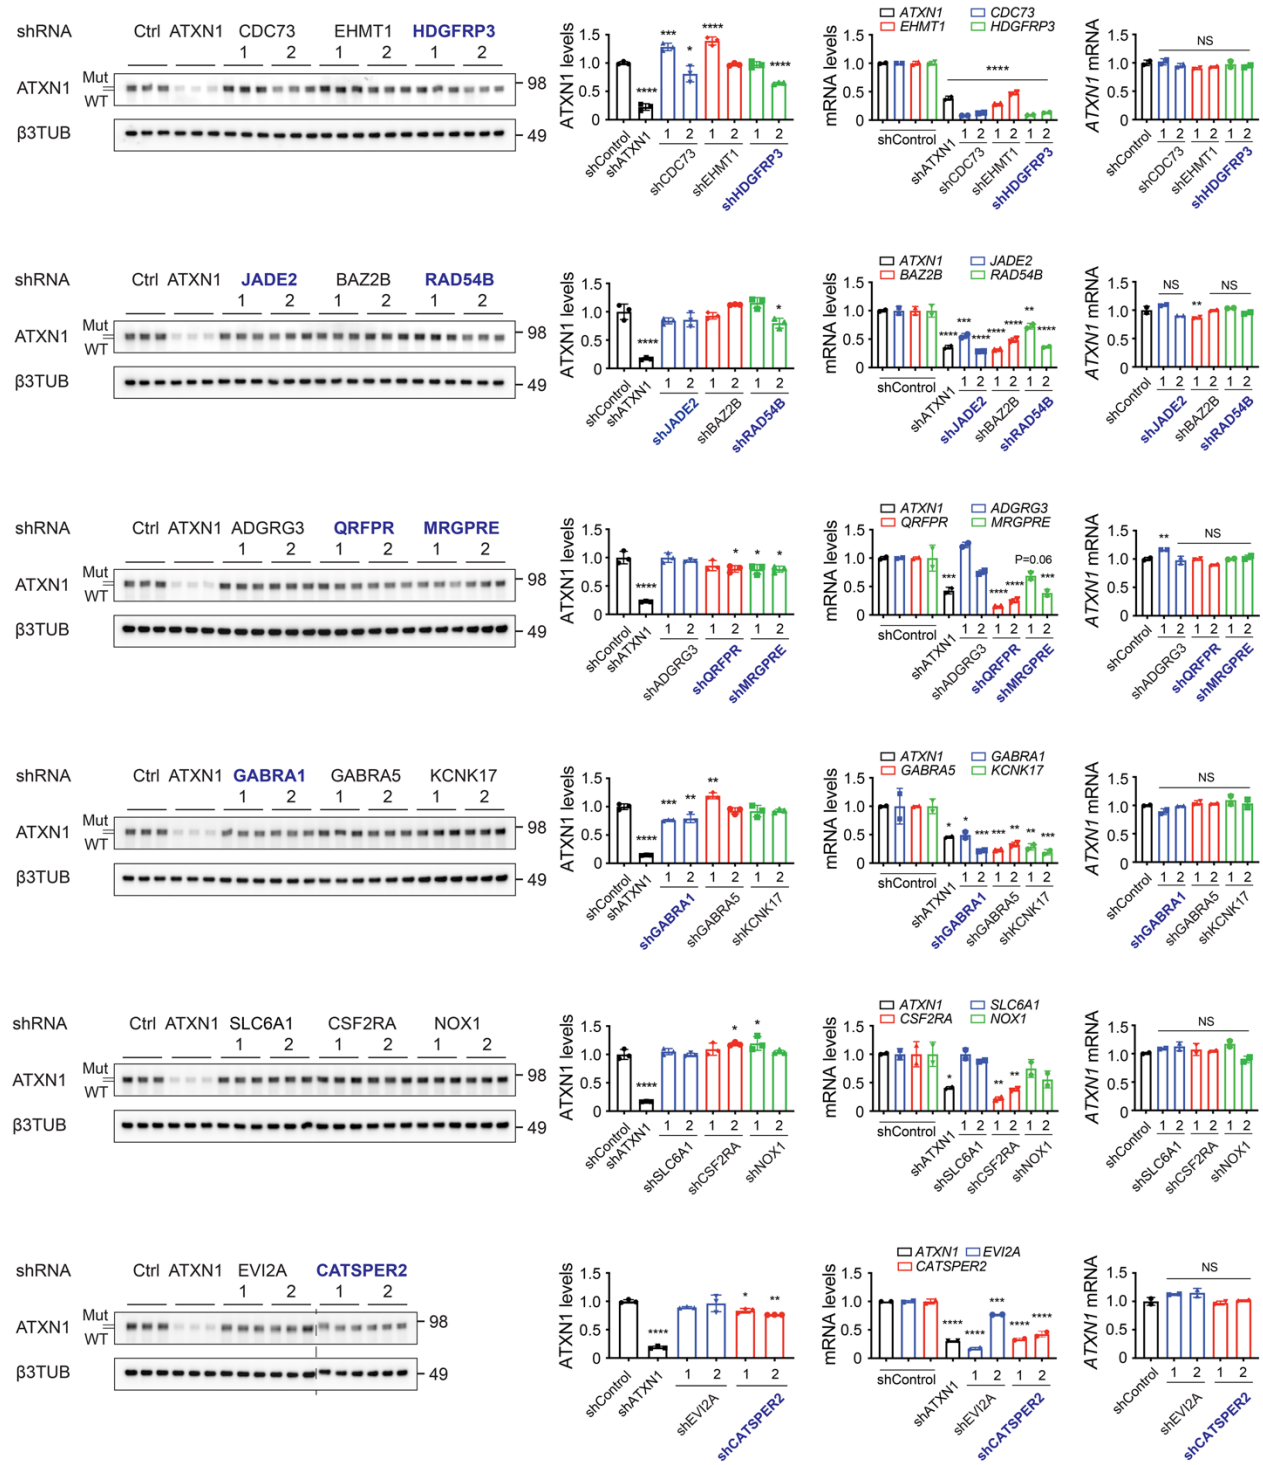

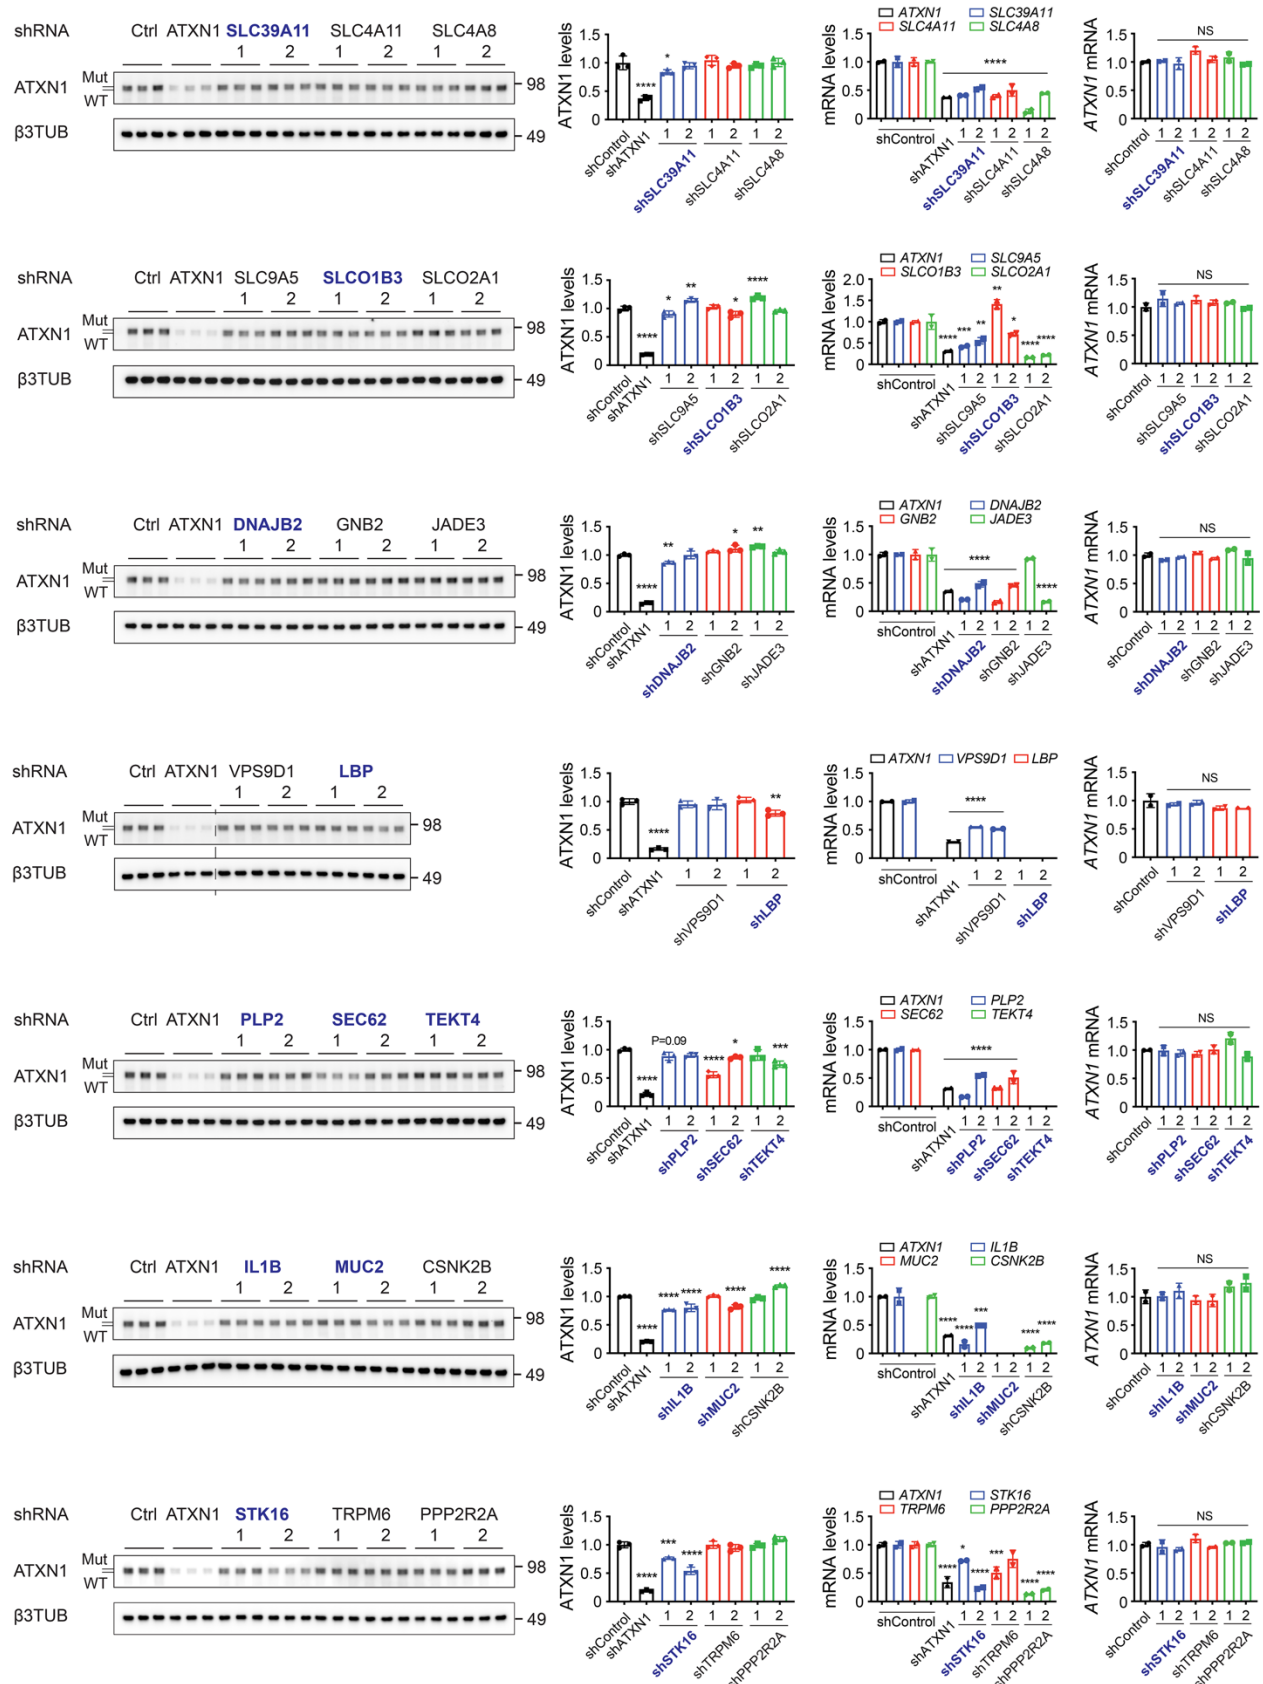

**Supplemental Figure 3. Validation of ATXN1 regulators by knocking them down in SCA1 patient iPSC-derived neurons.** Western blot analysis of mutant and wild-type ATXN1 and qRT-PCR results of target genes and *ATXN1* mRNA levels after knockdown of candidate genes in SCA1 patient iPSC-derived neurons. Blue colored genes are validated ATXN1 regulators. Left graphs: densitometry of total ATXN1 levels; Middle graphs: mRNA levels of genes targeted by each shRNA; Right graphs: *ATXN1* mRNA levels. Error bar:  $\pm$ SD, \* $p < 0.05$ , \*\* $p < 0.01$ , \*\*\* $p < 0.001$ , \*\*\*\* $p < 0.0001$ , One-way ANOVA, post-hoc: Dunnett's test for the left and right graphs; Tukey's test for the middle graphs.

## Supplemental Figure 4

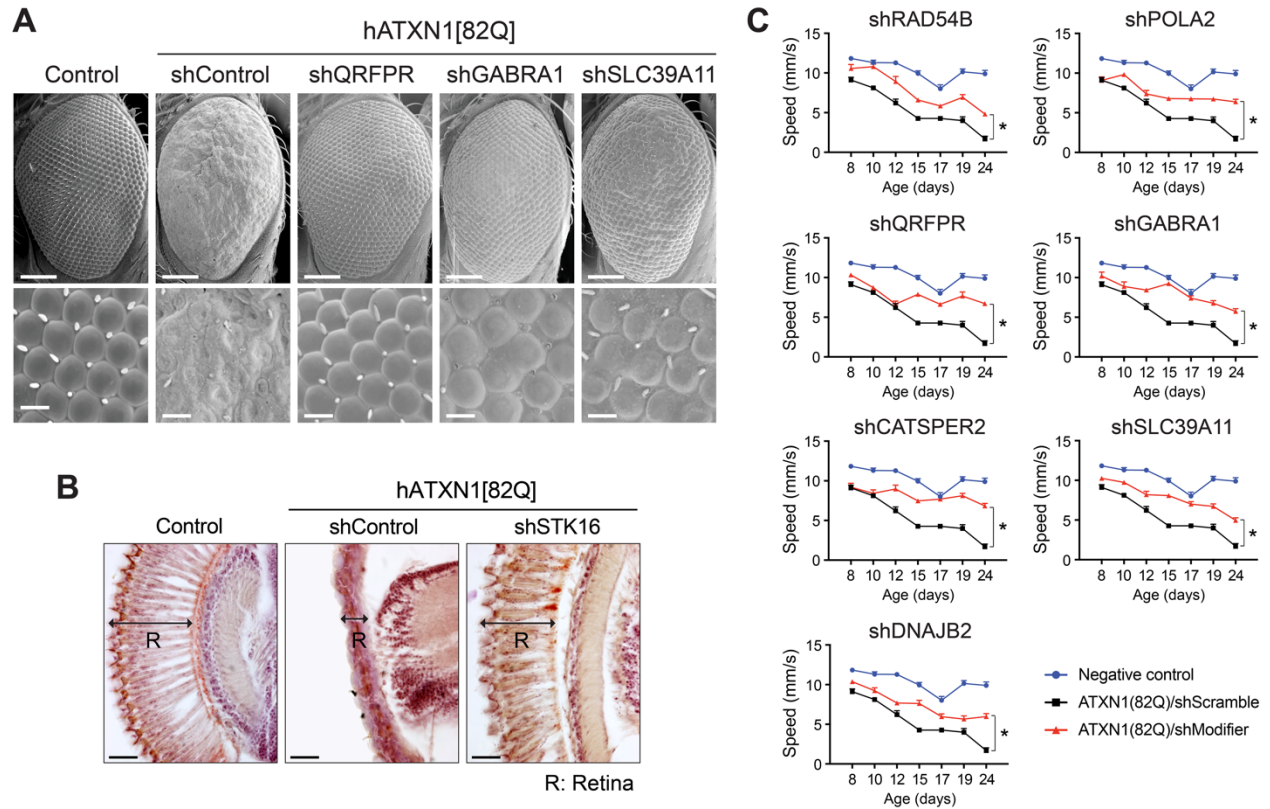

**Supplemental Figure 4. Validation of ATXN1 regulators in *Drosophila* eyes and central nervous system that express ATXN1[82Q].** (A) Scanning electron microscopy images of *Drosophila* eyes expressing human ATXN1[82Q] with knockdown of *Drosophila* homologues of the indicated genes. The same control eye image in Figure 3A was used for comparison. Scale bar = 100  $\mu$ m in the top images; 10  $\mu$ m in the bottom images. (B) Histological evaluation of retinal thickness of *Drosophila* expressing human ATXN1[82Q] with knockdown of fly STK16 homologue. These data support the rescue of eye degeneration by shSTK16 in Figure 3A. Scale bar = 20  $\mu$ m. (C) Effect of the knockdown of the indicated genes in the motor performance of *Drosophila* SCA1 model expressing ATXN1[82Q] in the central nervous system. Error bar:  $\pm$ SEM, \* $p < 0.05$ , Linear mixed-effect model ANOVA.



## Supplemental Figure 5

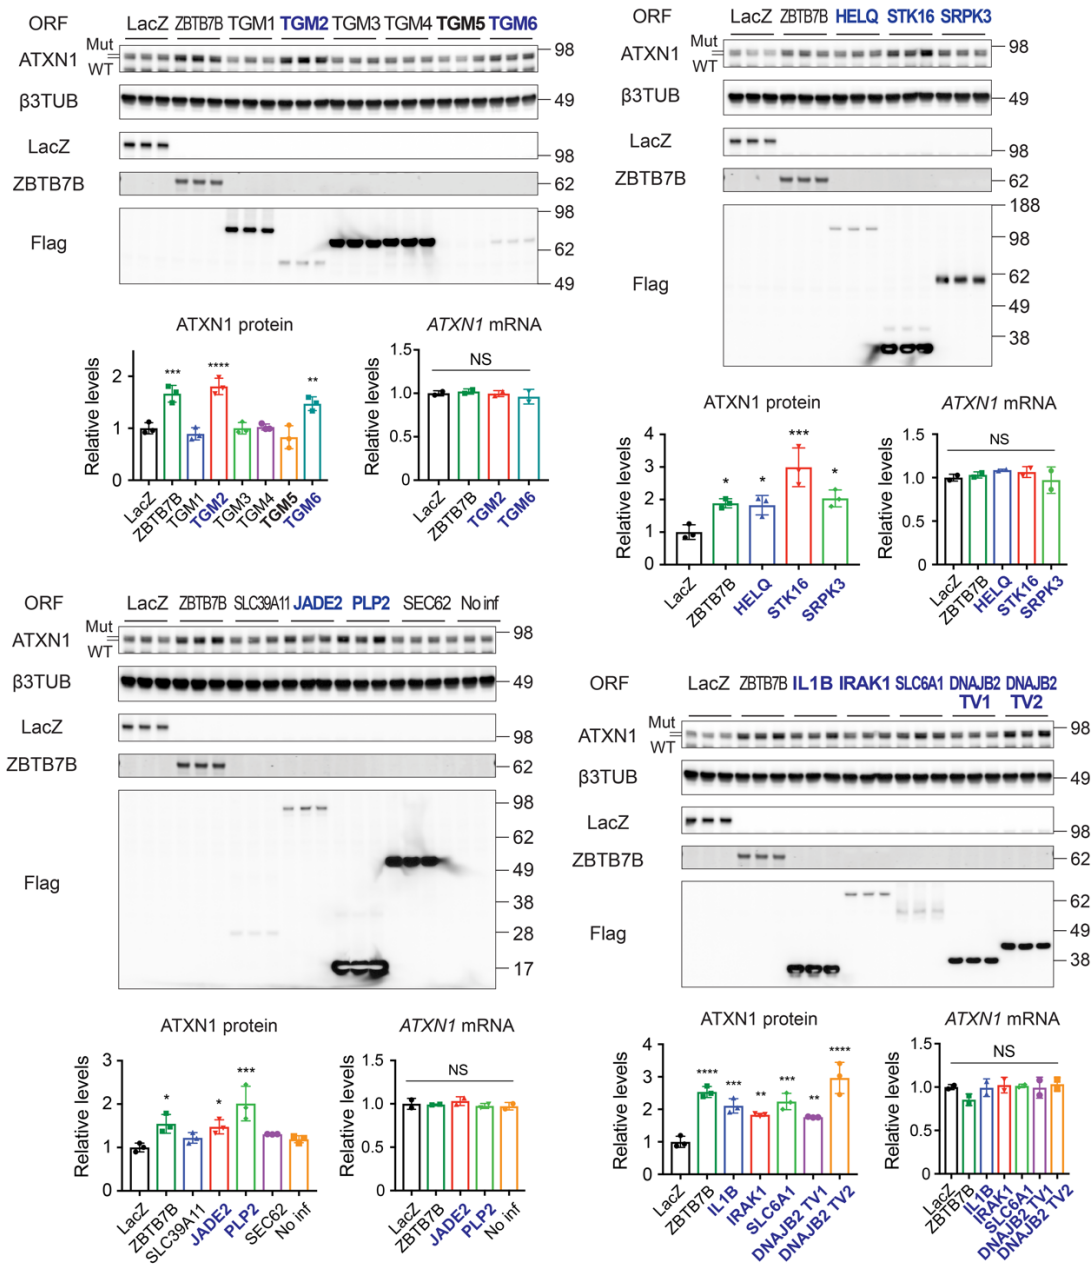

**Supplemental Figure 5. Validation of ATXN1 regulators by overexpressing them in SCA1 patient iPSC-derived neurons.** Western blot analysis of mutant and wild-type ATXN1 and qRT-PCR results of *ATXN1* mRNA levels after the overexpression of indicated genes for 9 days in the patient iPSC-derived neurons. ZBTB7B was used as a positive control. Genes whose overexpression increased ATXN1 protein levels are colored in blue. qPCR was performed for only the genes that show increase of ATXN1 protein levels. Overexpression of each gene was confirmed by flag antibody. Note that TGM5 was not expressed. Error bar:  $\pm$ SD, \* $p$ <0.05, \*\* $p$ <0.01, \*\*\* $p$ <0.001, \*\*\*\* $p$ <0.0001, One-way ANOVA, post-hoc: Dunnett's test.

## Supplemental Figure 6

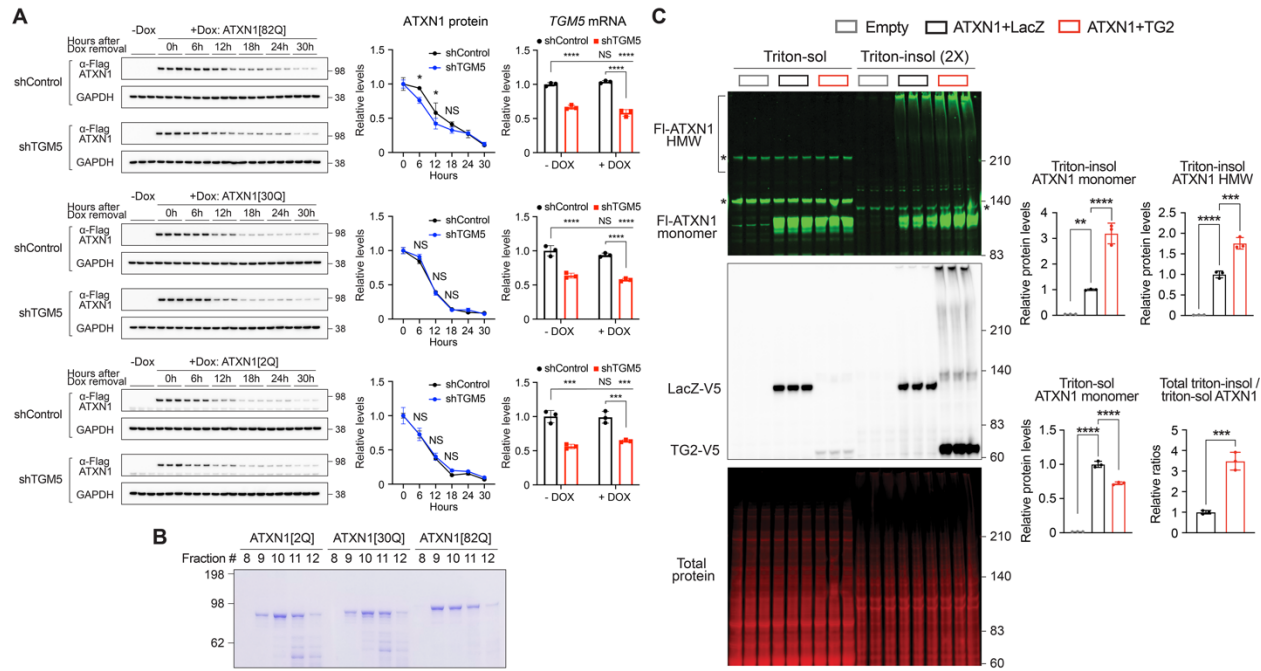

## Supplemental Figure 6. TGs regulate mutant ATXN1 stability and insoluble HMW levels.

**(A)** Stability assay of inducibly expressed ATXN1 with different polyQ-length in Daoy cells expressing shTGM5 or shControl. After a 48-hour doxycycline treatment for inducing ATXN1 expression, media was exchanged into growth media without doxycycline, and cells were collected every 6 hours until 30 hours after the media change. Knockdown of *TGM5* by shTGM5 was confirmed by qRT-PCR. Error bar:  $\pm$ SD, \* $p$ <0.05, \*\* $p$ <0.01, \*\*\* $p$ <0.001, \*\*\*\* $p$ <0.0001. Two-way ANOVA, post-hoc: Sidak's test for ATXN1 protein levels; Tukey's test for *TGM5* mRNA. **(B)** Coomassie staining of ATXN1[2Q], ATXN1[30Q], and ATXN1[82Q] that were purified from *E.coli*. Affinity purified proteins were subject to a size-exclusion chromatography (See Methods) and the fraction 8-12 were loaded on a gel. The fraction 9 or 10 of each protein was used for *in vitro* TG assay. **(C)** Western blot analysis of triton-soluble or -insoluble ATXN1 HMW and monomer that were extracted from the HEK293T cells overexpressing ATXN1[82Q] and TG2 or LacZ. Empty: empty vector; LacZ: overexpression control. Total triton-insoluble ATXN1 (HMW+monomer) to triton-soluble ATXN1 (monomer) ratio was calculated in each overexpression group and represented in the bottom right graph. Asterisks indicate non-specific bands. Error bar:  $\pm$ SD, \*\* $p$ <0.01, \*\*\* $p$ <0.001, \*\*\*\* $p$ <0.0001, two-tailed t-test for the bottom right graph; one-way ANOVA for the other graphs with post-hoc Dunnett's test.

## **Supplemental Methods**

### **Knockdown of candidate ATXN1 regulators in wild-type Daoy cells**

The cell culture and lentiviral transduction of wild-type Daoy cells are the same with those of transgenic Daoy cells as described above. Daoy cells transduced with the lentivirus listed in **Supplemental Table 5** were selected by puromycin (1 µg/ml) for two days, and subcultured into 24-well plates in growth media supplemented with puromycin (1 µg/ml), followed by incubation for 3 days. Half of the cells were subcultured into new 24-well plates in media without puromycin and cultured for 3 more days. Protein was then extracted for western blot as described above.

### **Reverse transcription and qRT-PCR**

TRIzol<sup>®</sup> reagent (Invitrogen) and RNeasy Kit (Qiagen) were used for extracting RNA from tissue and cells, respectively. SuperScript<sup>®</sup> III First-strand Synthesis kit (Invitrogen) was used to reverse-transcribe 150-2,000 ng of total RNA. Primers designed to span exons, cDNA (10-20 ng), PowerUp SYBR Green Master Mix (Fisher Scientific, A25778), and water were mixed in a total volume of 20 µl, and then run in C1000<sup>™</sup> Thermal Cycler (BioRad). Relative gene expression was calculated by regular  $\Delta\Delta C_t$  method, where ACTB or GAPDH was used as a reference gene. The sequences of all primers are listed in **Supplemental Table 7**.

### **Producing ATXN1[2Q]/[30Q]/[82Q] in *E.coli***

Human ATXN1[2Q] and ATXN1[30Q] were cloned into pET-28a(+)-TEV vector, and N-terminal SUMO-conjugated ATXN1[82Q] was cloned into MCS1 region of pCDFDuet-1 vector (Novagen, 71340-3). These vectors were transformed into BL21(DE3) Competent *E. coli* (New England Biolabs, C2527H) and grown overnight in 10 ml of LB medium supplemented with kanamycin (50 µg/ml) and spectinomycin (50 µg/ml) for the pET-28a(+)-TEV and pCDFDuet-1 vector, respectively. The

cells were inoculated into 500 ml of LB media supplemented with the same antibiotics. When the cells reach 0.5 of OD<sub>600</sub> value, they were induced to express proteins with 0.2% L-arabinose and 0.5 mM IPTG for 4 hours at 30°C for SUMO-ATXN1[82Q] and for 3 hours at 37°C for all the other proteins and then spun down at 6,000 rpm for 30 min at 4°C. The cells were resuspended in 10 ml of lysis buffer (6M urea, 20 mM 2-mercaptoethanol, 0.5 M NaCl, 30 mM Imidazole and 50 mM NaPO<sub>4</sub>, [pH 7.4]) and probe sonicated (total 100 pulses, output 3, duty cycle 40%). Samples were passed through a 10 ml syringe fitted with a 22G needle 3 times with and spun down at 10,000 rpm for 1 hour at 4 °C. The supernatant loaded onto Ni Sepharose High Performance beads (GE Healthcare, 17-5268-02) and passed through the column fitted with a 22G needle by gravity flow. The beads that bind SUMO-ATXN1[82Q] were washed four times serially with 6M, 2M, 1M, and 0.5M urea lysis buffer diluted in PBS, follow by elution with 300 mM imidazole in 0.4M Urea lysis buffer. The beads that bind ATXN1[2Q] or ATXN1[30Q] were washed four times with the 6M urea lysis buffer and eluted with 300 mM imidazole in the 6M lysis buffer. The SUMO-ATXN1[82Q] fraction with the highest protein concentration was incubated with SUMO hydrolase (50 µg) for 3 hours at RT. The fractions of ATXN1[30Q] and ATXN1[2Q] with the highest protein concentration were diluted into 4-fold with PBS (1.5 M urea). These deSUMOylated or diluted fractions were further subjected to size-exclusion chromatography. Briefly, 700 µl of the eluted protein was run on a Superdex S200 (Cytiva, 28-9909-44) in 1M Urea in PBS on an AKTA UPC 10 FPLC system (Cytiva). Fractions are eluted directly into a 100X protease inhibitor cocktail. Three MW markers [thyroglobulin (667 kDa), BSA (64 kDa), and cytochrome C (12 kDa)] were used to standardize the column. The size and purity of the purified proteins were confirmed by coomassie staining and the fraction 9 or 10 of each protein was used for *in vitro* TG assay.

### **Co-immunoprecipitation (Co-IP)**

HEK293T cells were plated in a 6-well plate (800,000 cells/well). Next day, the cells were transfected with 500 ng of pcDNA1.1 ATXN1[82Q] and ATXN1[30Q] vector with 1 µg of W118-1 TG5-

flag or TG2-flag vector using *TransIT*<sup>®</sup>-293 reagent and then incubated for 48 hours. For cell lysis, cold CLB (1 ml/well) were added onto the cells and the cell lysate was collected in a new tube. After centrifugation at 13,000 rpm for 15 min at 4°C, the supernatant was transferred into a new tube and 20 µl of the supernatant was saved for Input (pre-IP). Dynabeads<sup>™</sup> Protein G (Invitrogen, 10004D) was transferred to a test tube (25 µl/IP sample), washed with PBS, and incubated with anti-V5 antibody (3 µg/IP sample; Invitrogen, R960-25) in PBS with 0.1% Tween-20 for an hour on a nutator. The dynabeads were then washed with CLB and added into each cell lysate, followed by overnight incubation with rotation at 4°C. After saving 20 µl of the lysates for post-IP, the rest of the lysates were discarded. The dynabeads were washed 4 times with CLB and boiled in 27 µl of 1X NuPAGE<sup>™</sup> LDS Sample Buffer, together with the pre- and post-IP samples mixed with 7 µl of 4X sample buffer. The samples were run in 3-8% Tris-acetate gel, and the rest of western blot was performed.

### ***Drosophila histology***

For histological staining of *Drosophila* paraffin sections, flies were fixed with 4% formaldehyde in 1X PBS and their heads were dehydrated in increasing concentrations of ethanol. After clearing in xylenes and embedding in paraffin overnight, the heads were sectioned at 10 µm thickness and mounted onto slides. The sections were rehydrated and stained with hematoxylin solution for 1 min. Histology images were captured using a Nikon Microphot-FXA Microscope equipped with Zeiss AxioCam MRc camera.

Uncropped western blot images



# Figure 2A

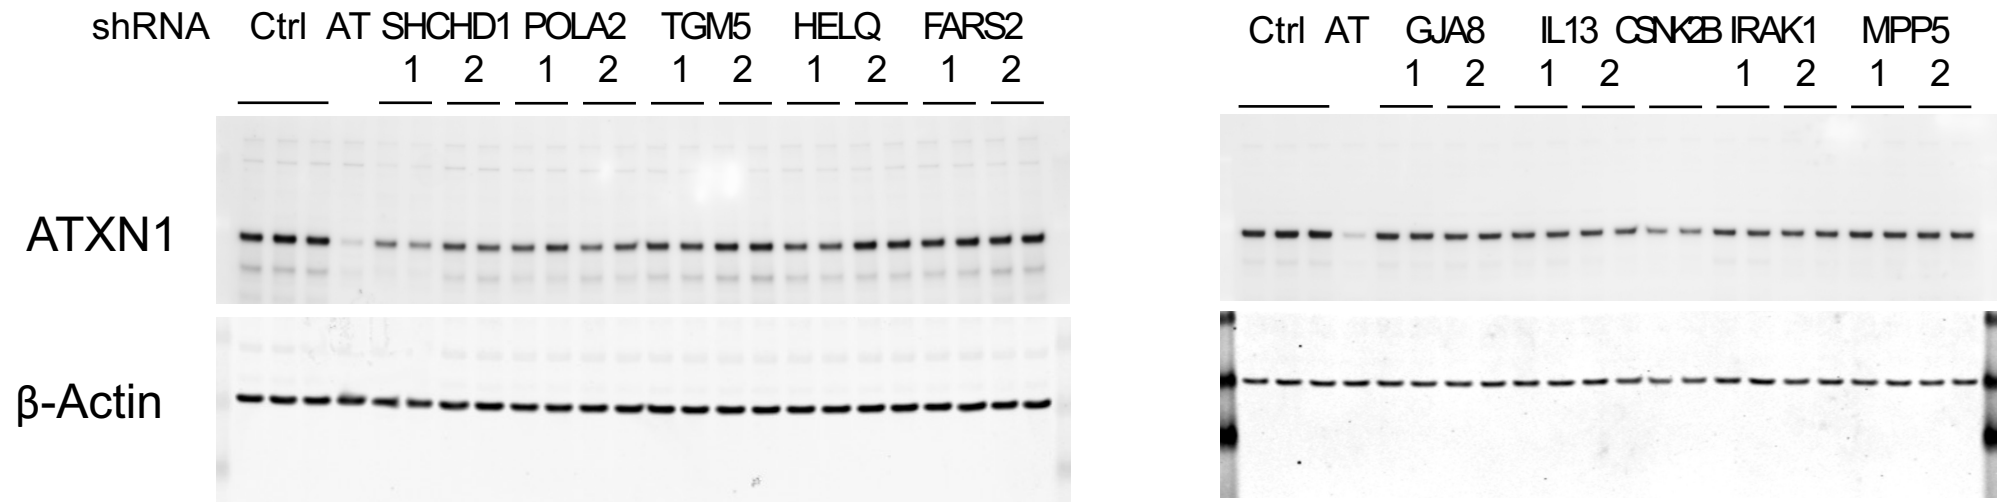

# Figure 2D

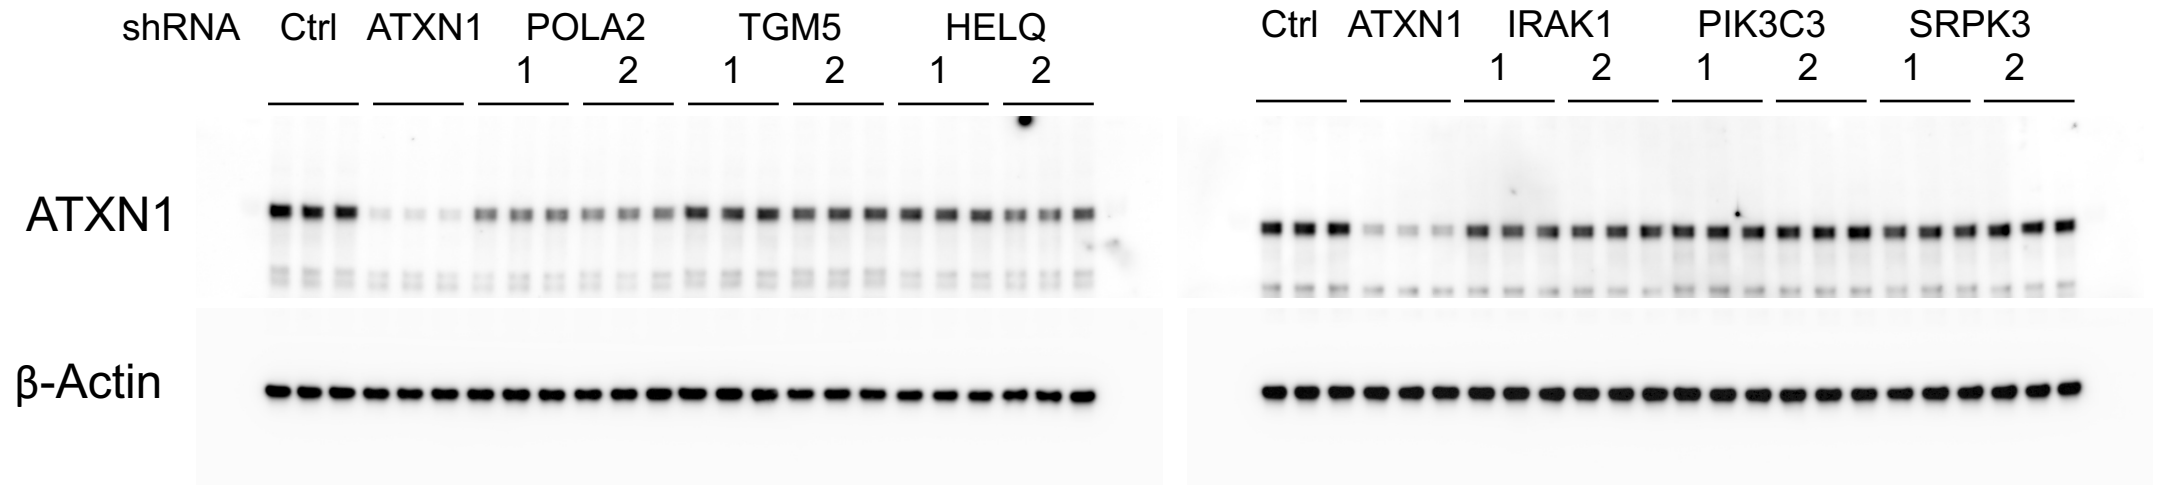

Figure 3D

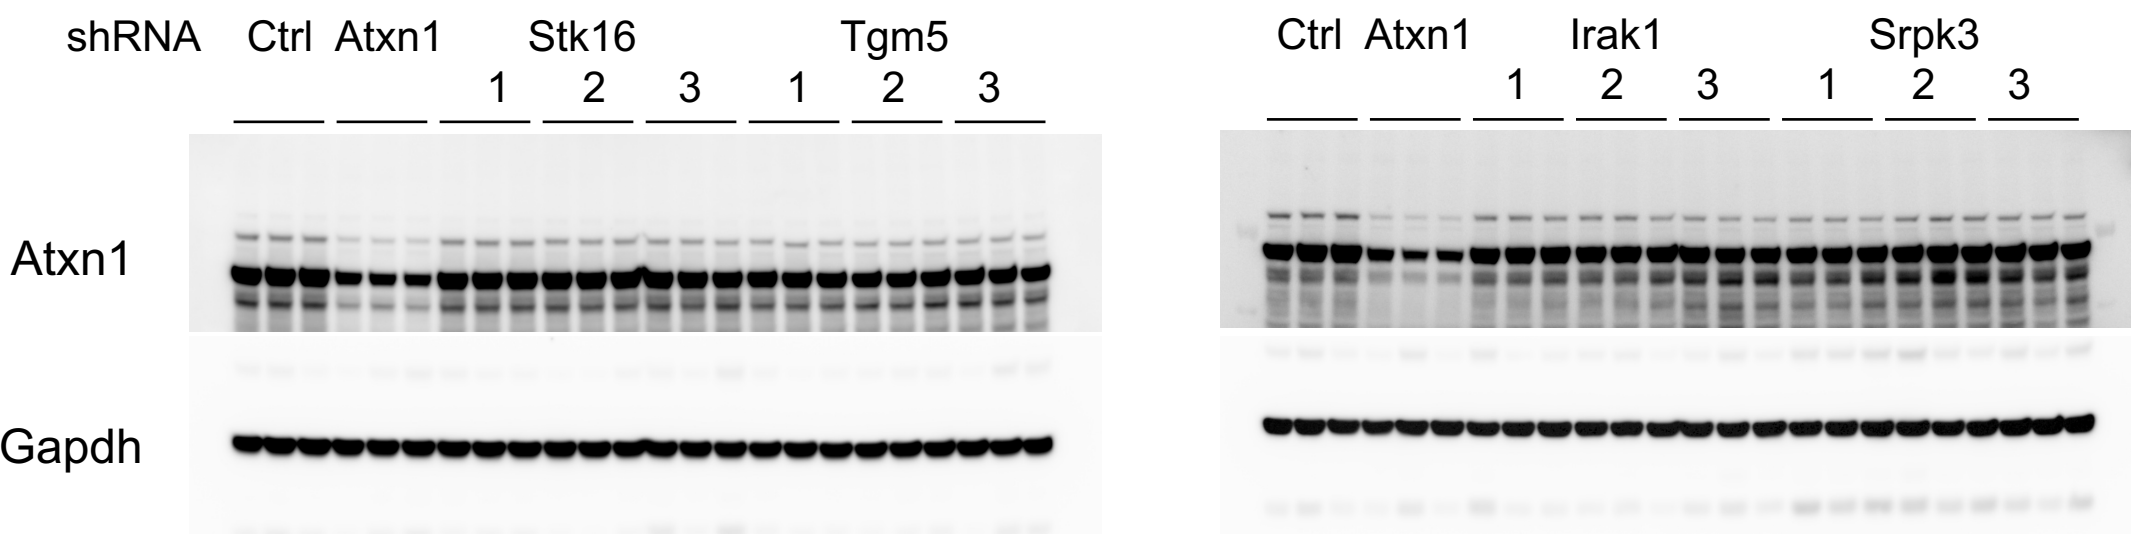

Figure 4B

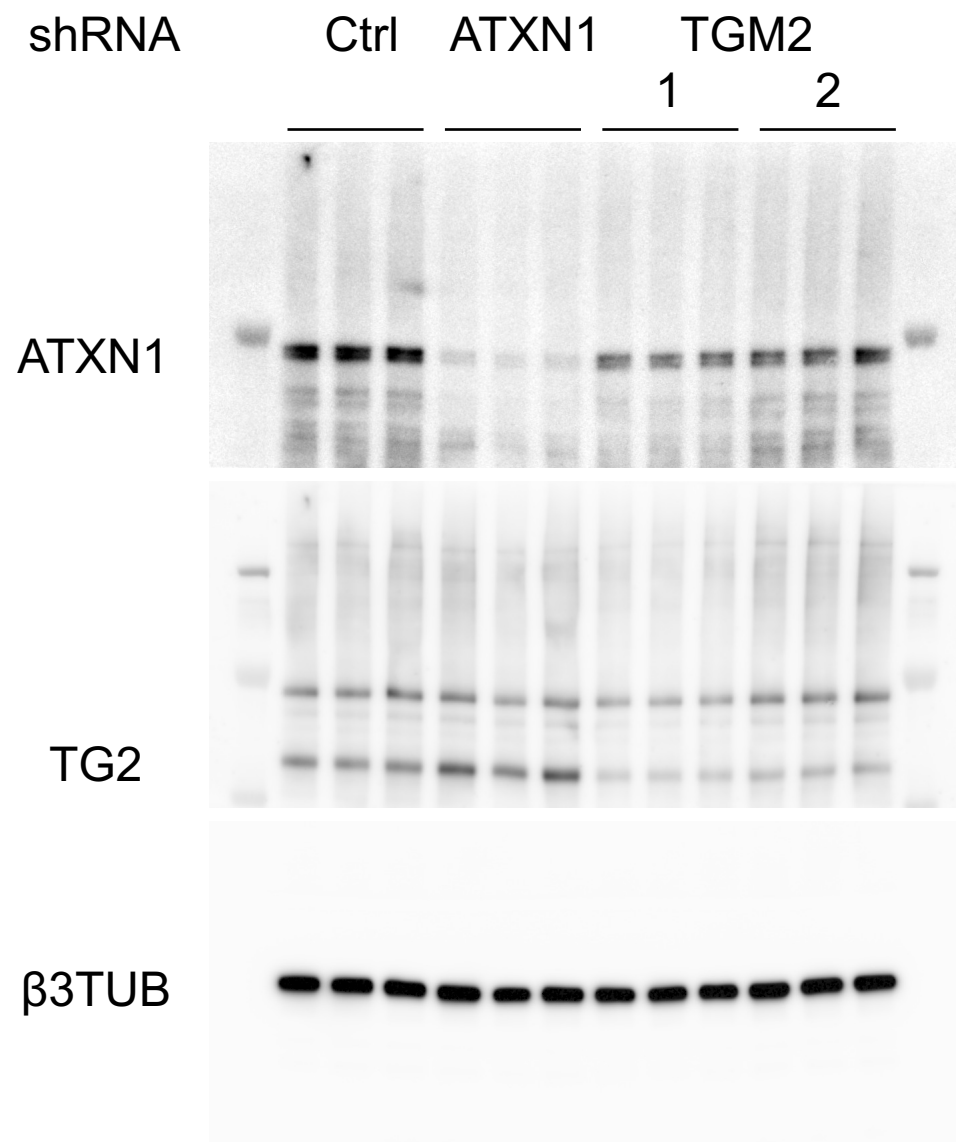

Figure 4C

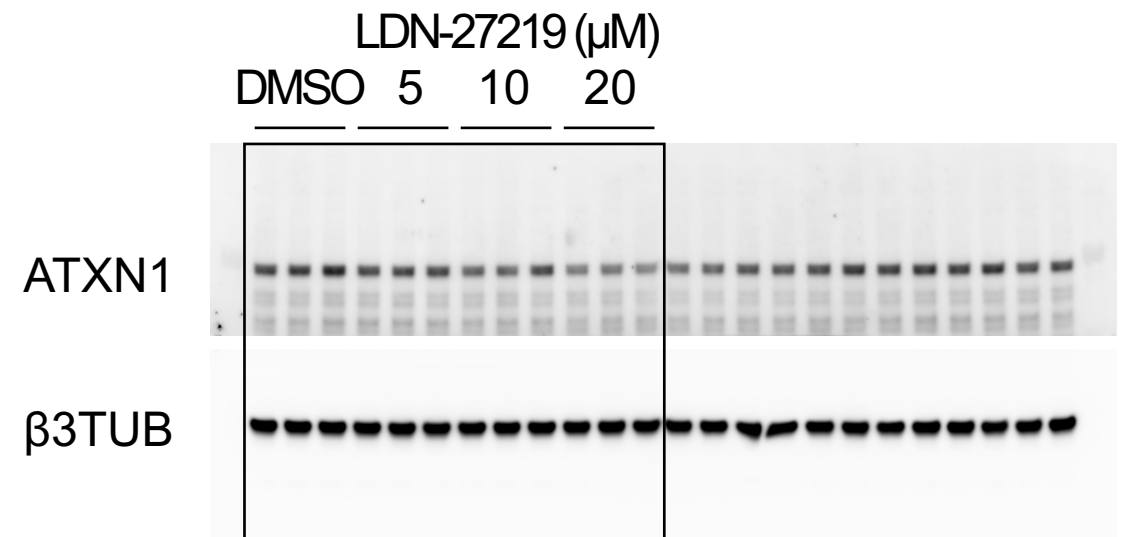

Figure 4D

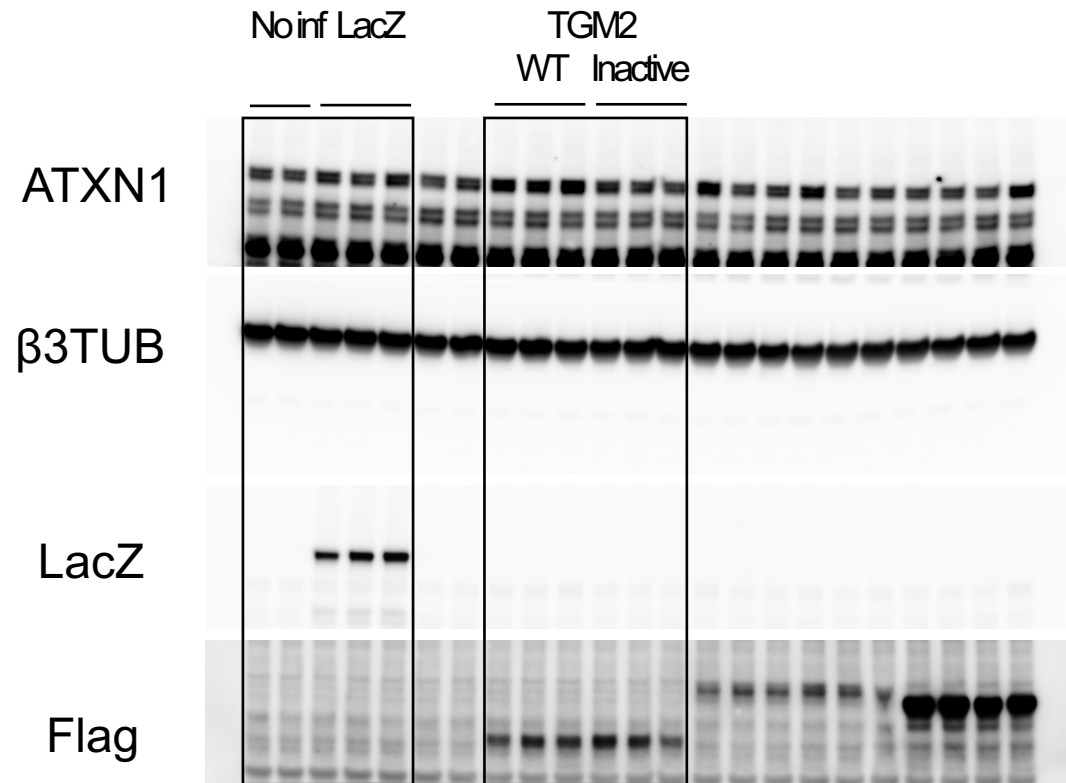

Figure 4E

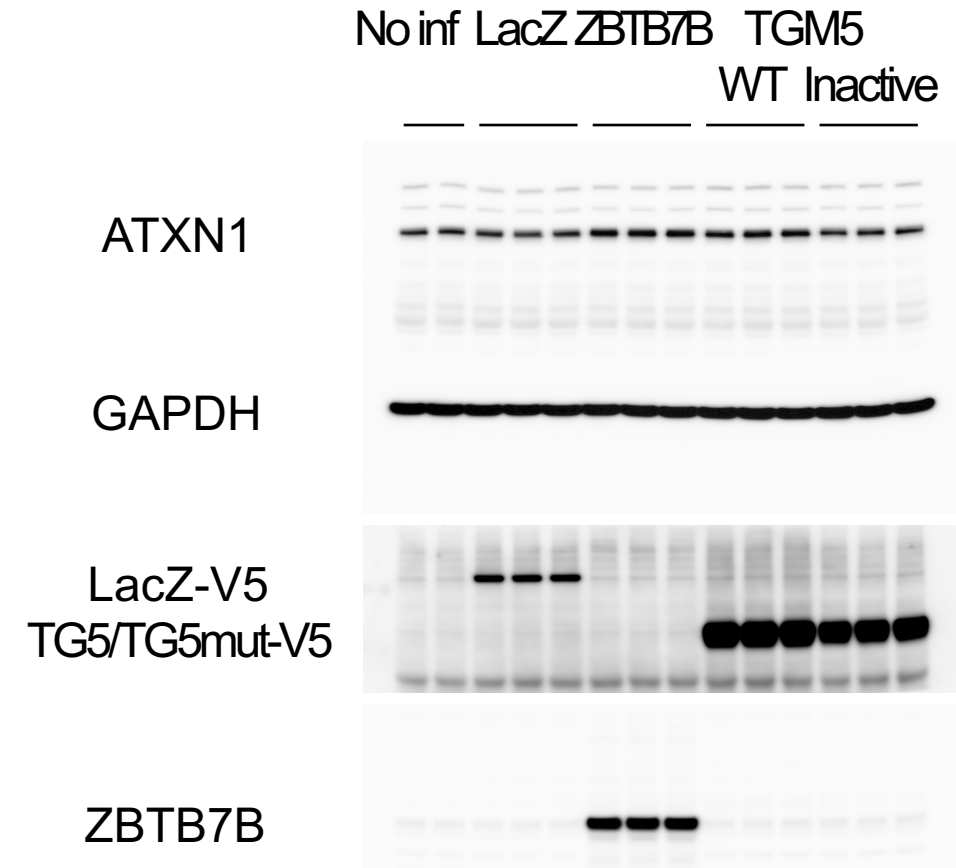

Figure 4F

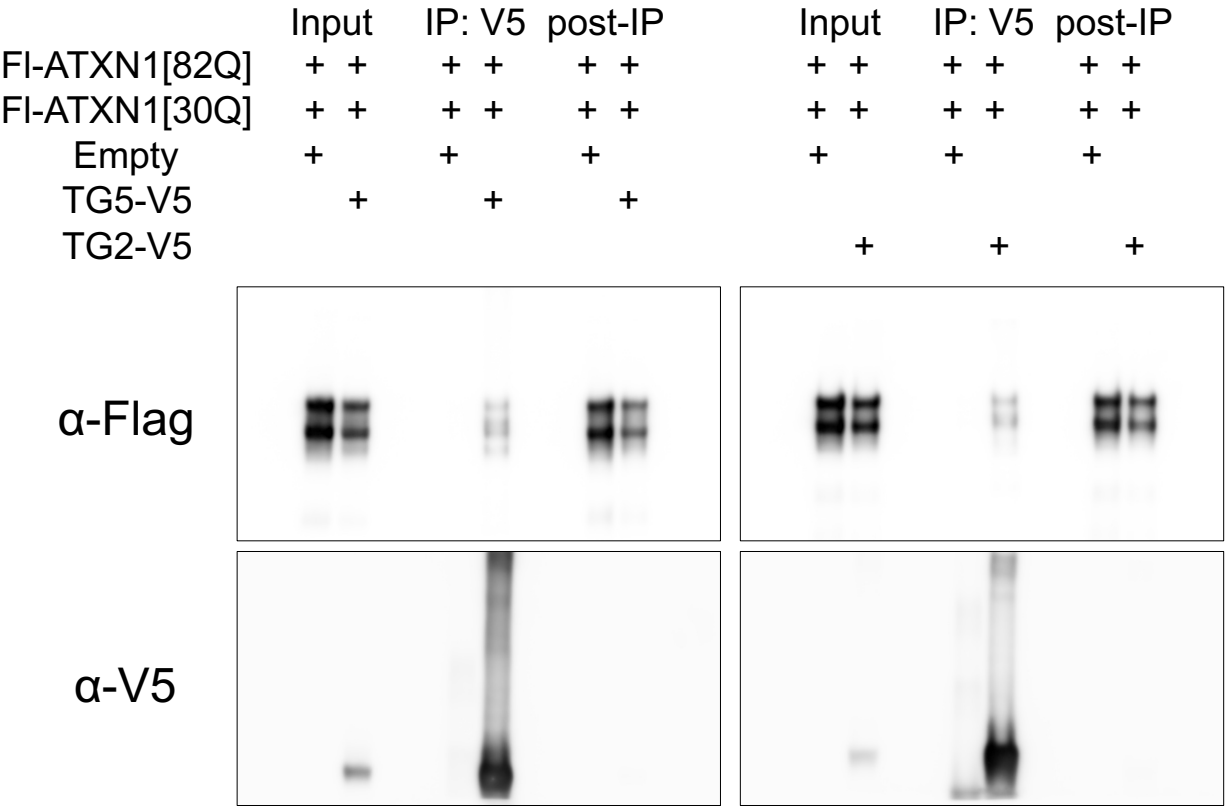

Figure 4H  
ATXN1[82Q]

-DOX                      +DOX  
                                 0h    6h    12h   18h   24h   30h

TG2  
(shControl)

TG2  
(shTG2-1)

TG2  
(shTG2-2)

shControl  
α-Flag  
ATXN1  
  
GAPDH

shTG2-1  
α-Flag  
ATXN1  
  
GAPDH

shTG2-2  
α-Flag  
ATXN1  
  
GAPDH

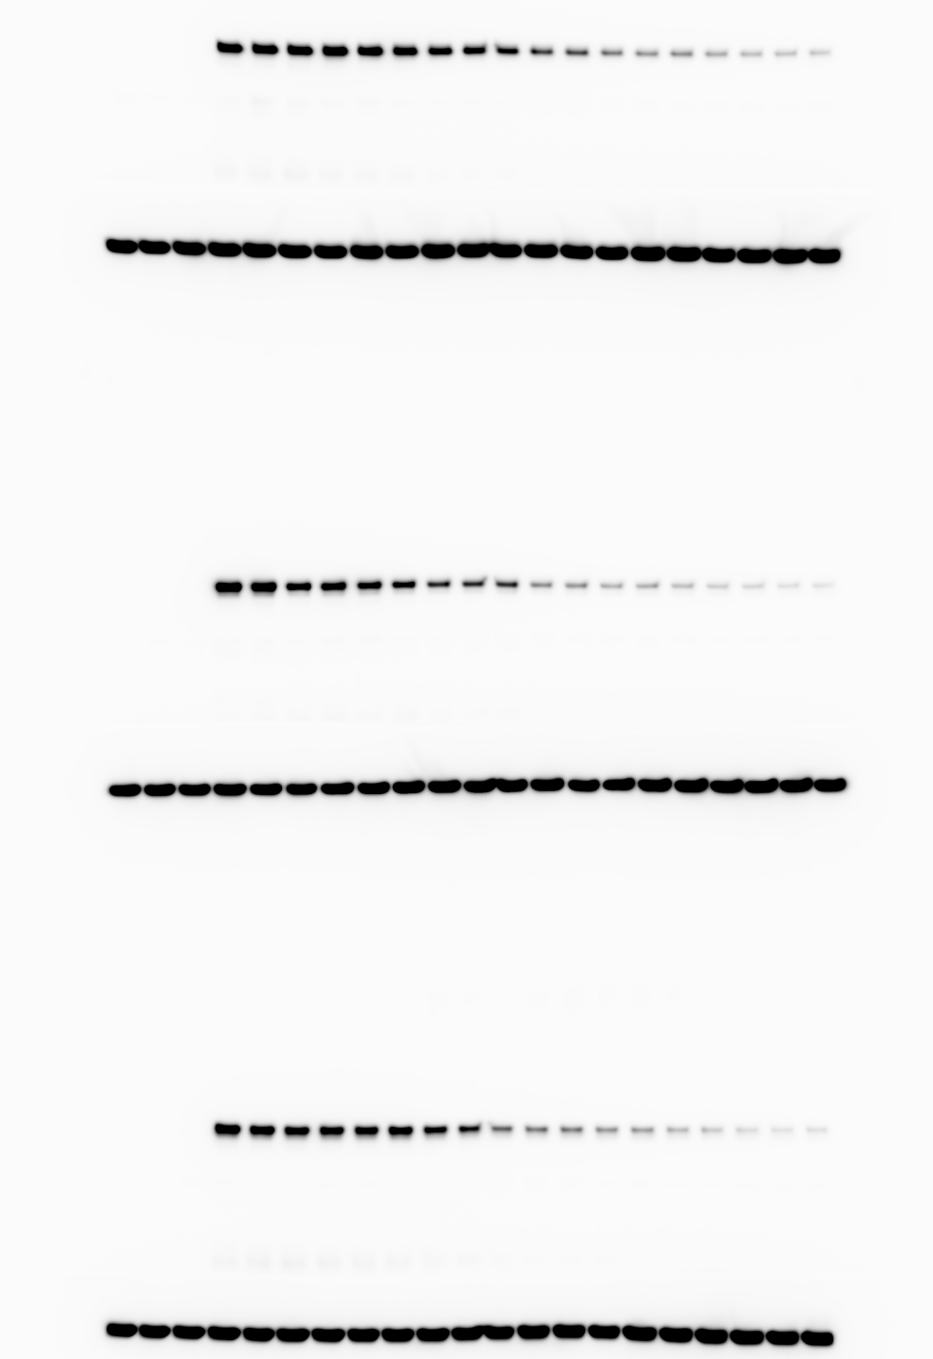



Figure 4H  
ATXN1[30Q]

-DOX                      +DOX  
                                 0h   6h   12h   18h   24h   30h

TG2  
(shControl)

TG2  
(shTG2-1)

TG2  
(shTG2-2)

shControl

α-Flag  
ATXN1

GAPDH

shTG2-1

α-Flag  
ATXN1

GAPDH

shTG2-2

α-Flag  
ATXN1

GAPDH

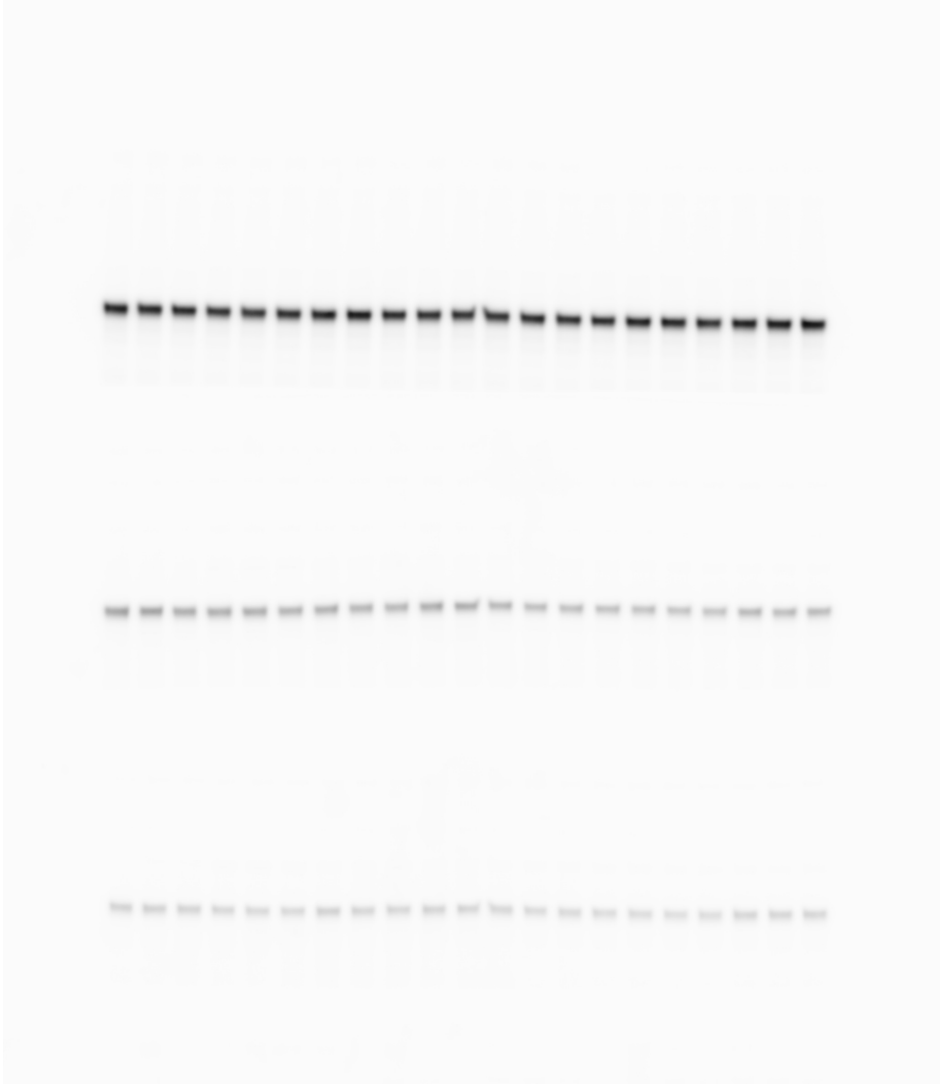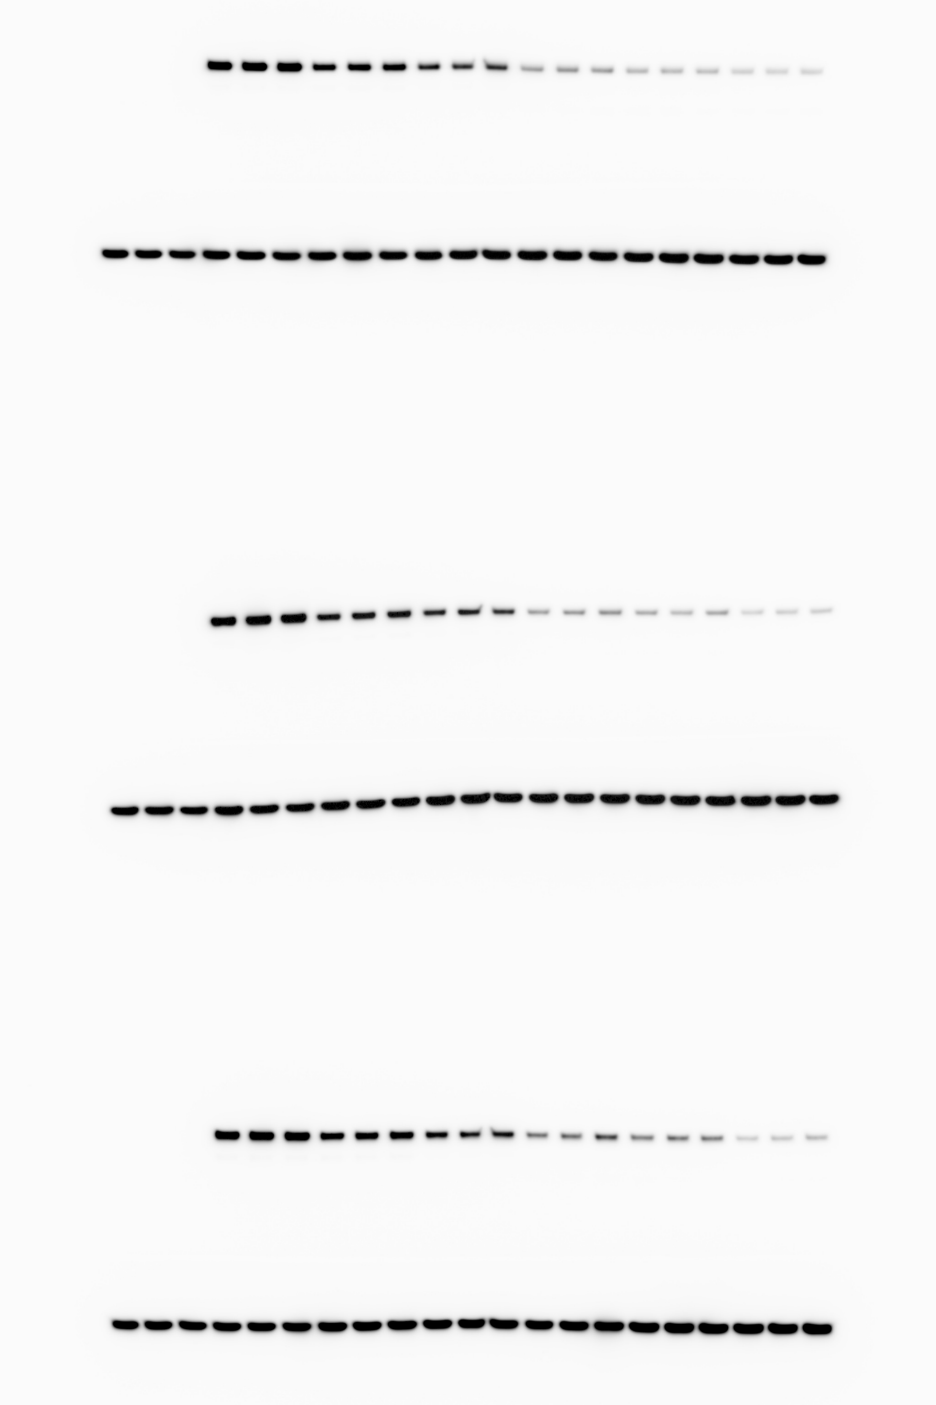

Figure 4H  
ATXN1[2Q]

-DOX                      +DOX  
                                 0h   6h   12h   18h   24h   30h

TG2  
(shControl)

TG2  
(shTG2-1)

TG2  
(shTG2-2)

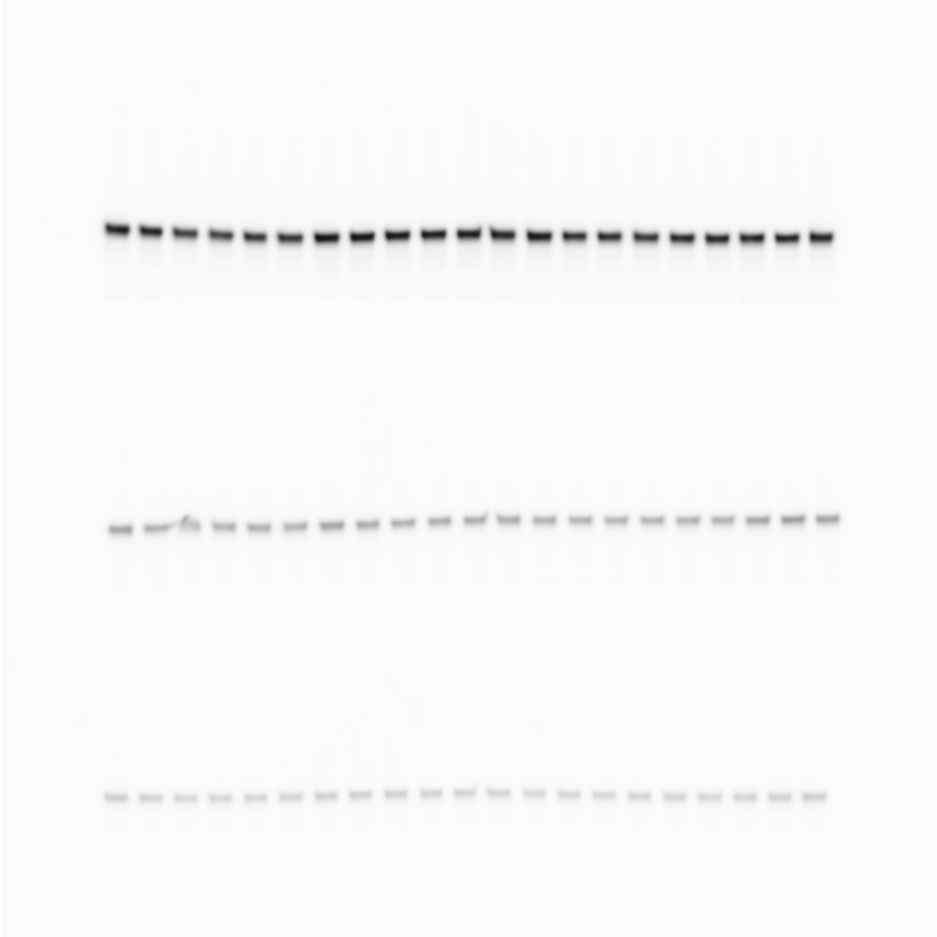

shControl  
α-Flag  
ATXN1  
  
GAPDH

shTG2-1  
α-Flag  
ATXN1  
  
GAPDH

shTG2-2  
α-Flag  
ATXN1  
  
GAPDH

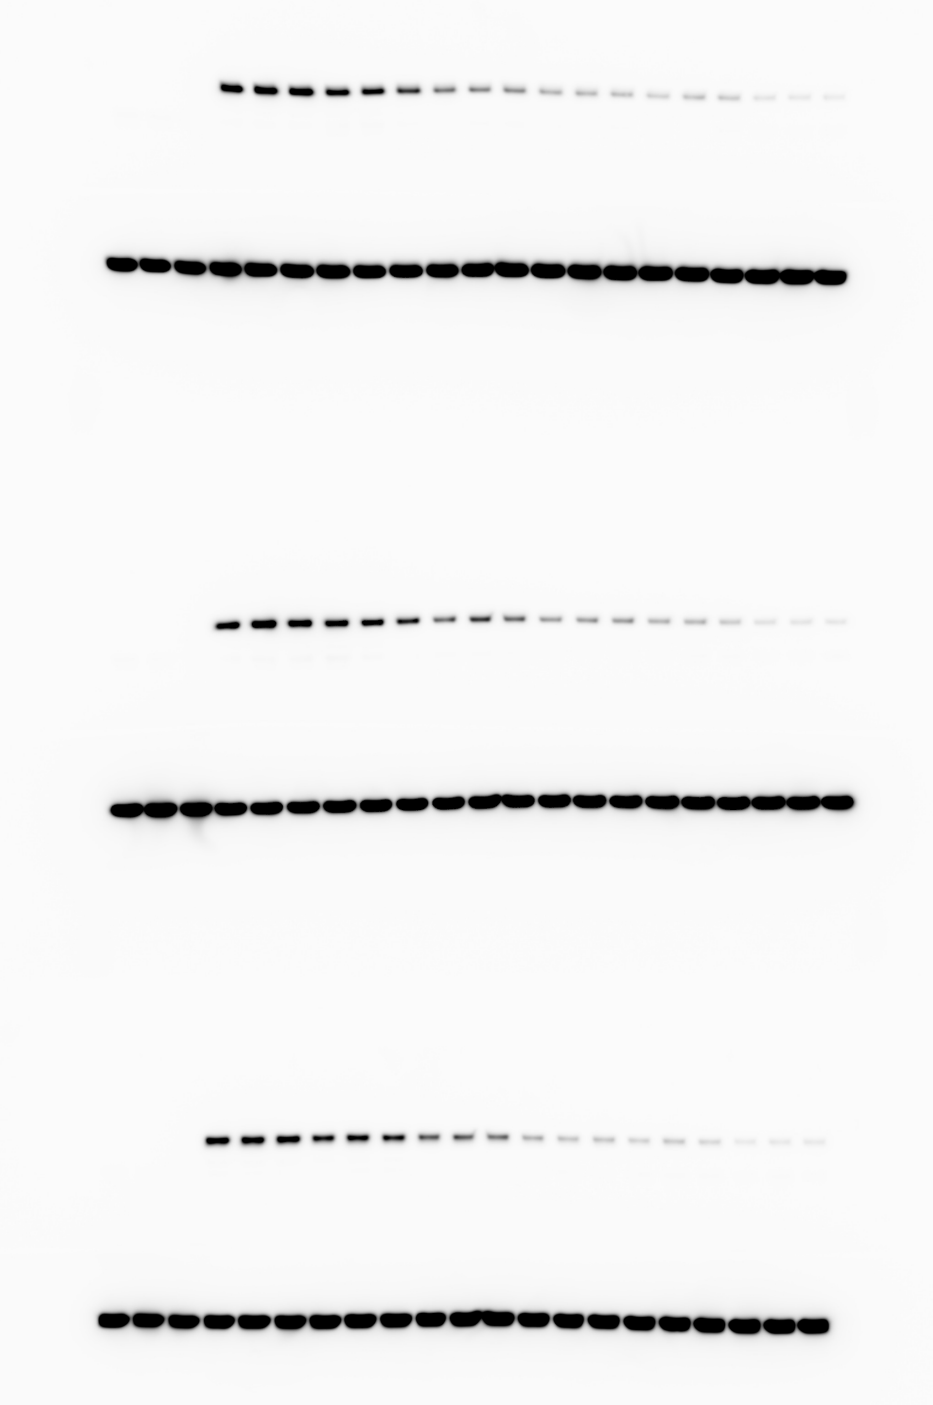

# Figure 5A

|                  |   |   |      |   |   |   |
|------------------|---|---|------|---|---|---|
| ATXN1[82Q]       | + | + | +    | + | + | + |
| TG2              |   | + | boil | + | + | + |
| Ca <sup>2+</sup> | + | + | +    |   | + | + |
| Cystamine        |   |   |      |   | + |   |
| LDN-27219        |   |   |      |   |   | + |

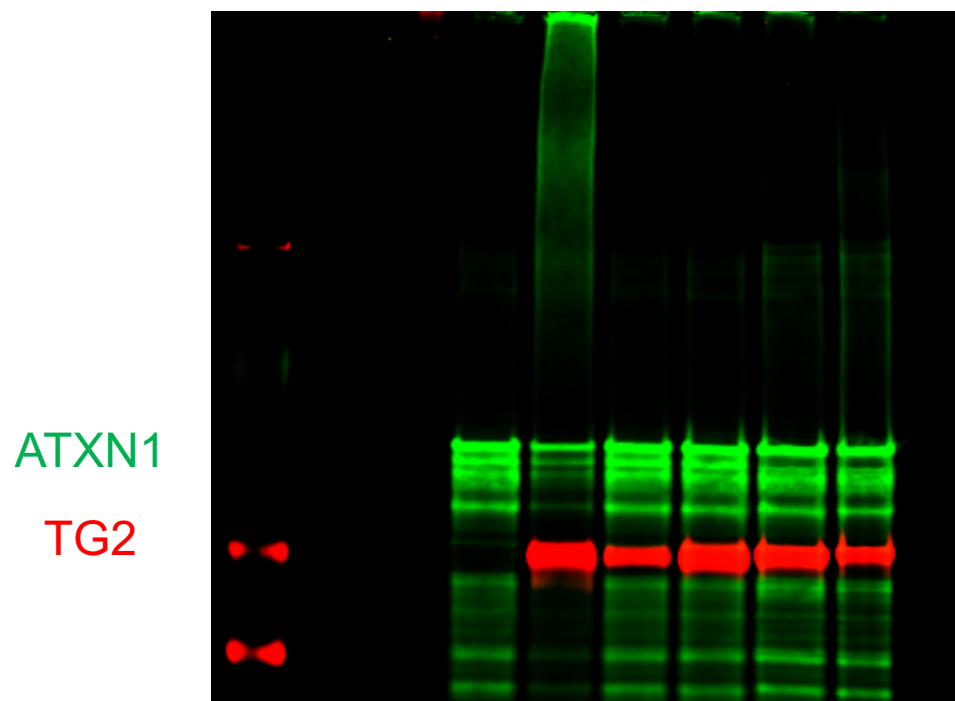

# Figure 5B

|            |   |   |   |   |   |    |    |   |   |   |   |    |    |   |   |   |
|------------|---|---|---|---|---|----|----|---|---|---|---|----|----|---|---|---|
| ATXN1[82Q] |   |   | + | + | + | ++ |    |   |   | + | + | +  | ++ |   |   |   |
| ATXN1[30Q] |   | + |   |   | + |    | ++ |   | + |   | + |    | ++ |   |   |   |
| ATXN1[2Q]  | + |   |   | + |   | ++ |    | + |   | + |   | ++ |    |   |   |   |
| TG2        |   |   |   |   |   |    |    |   | + | + | + | +  | +  | + | + | + |

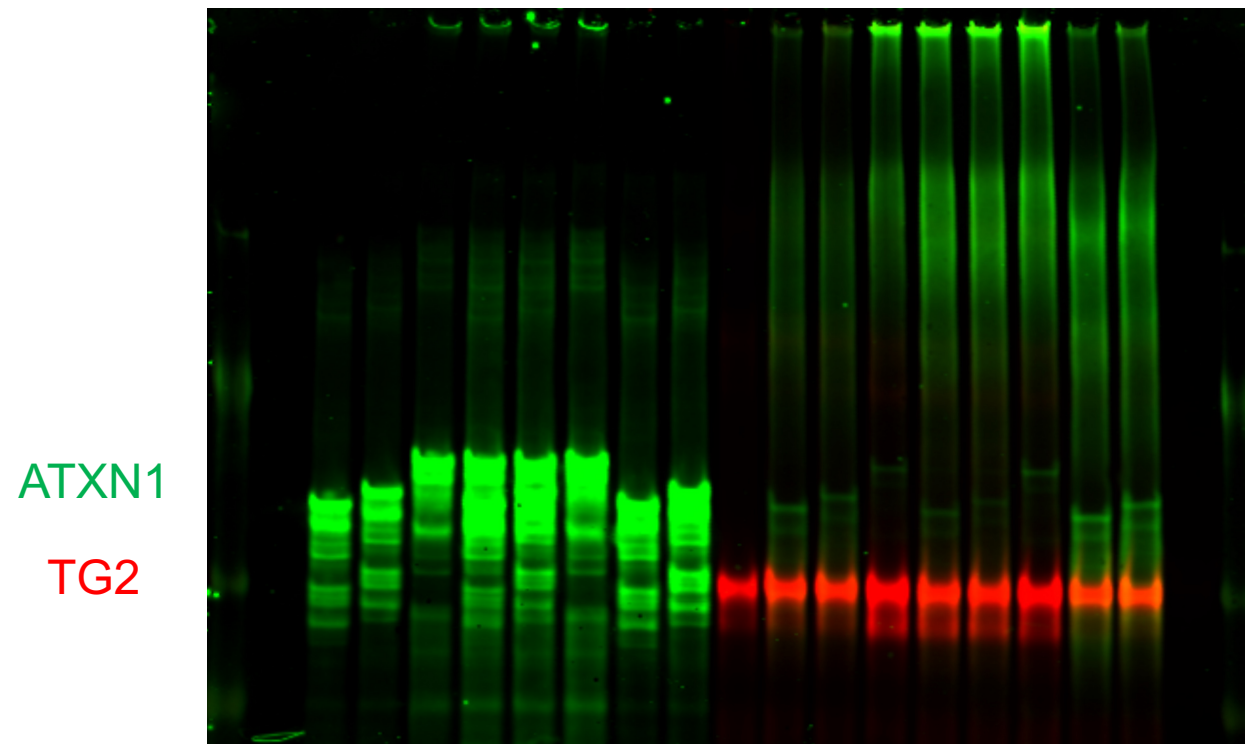

Figure 5C

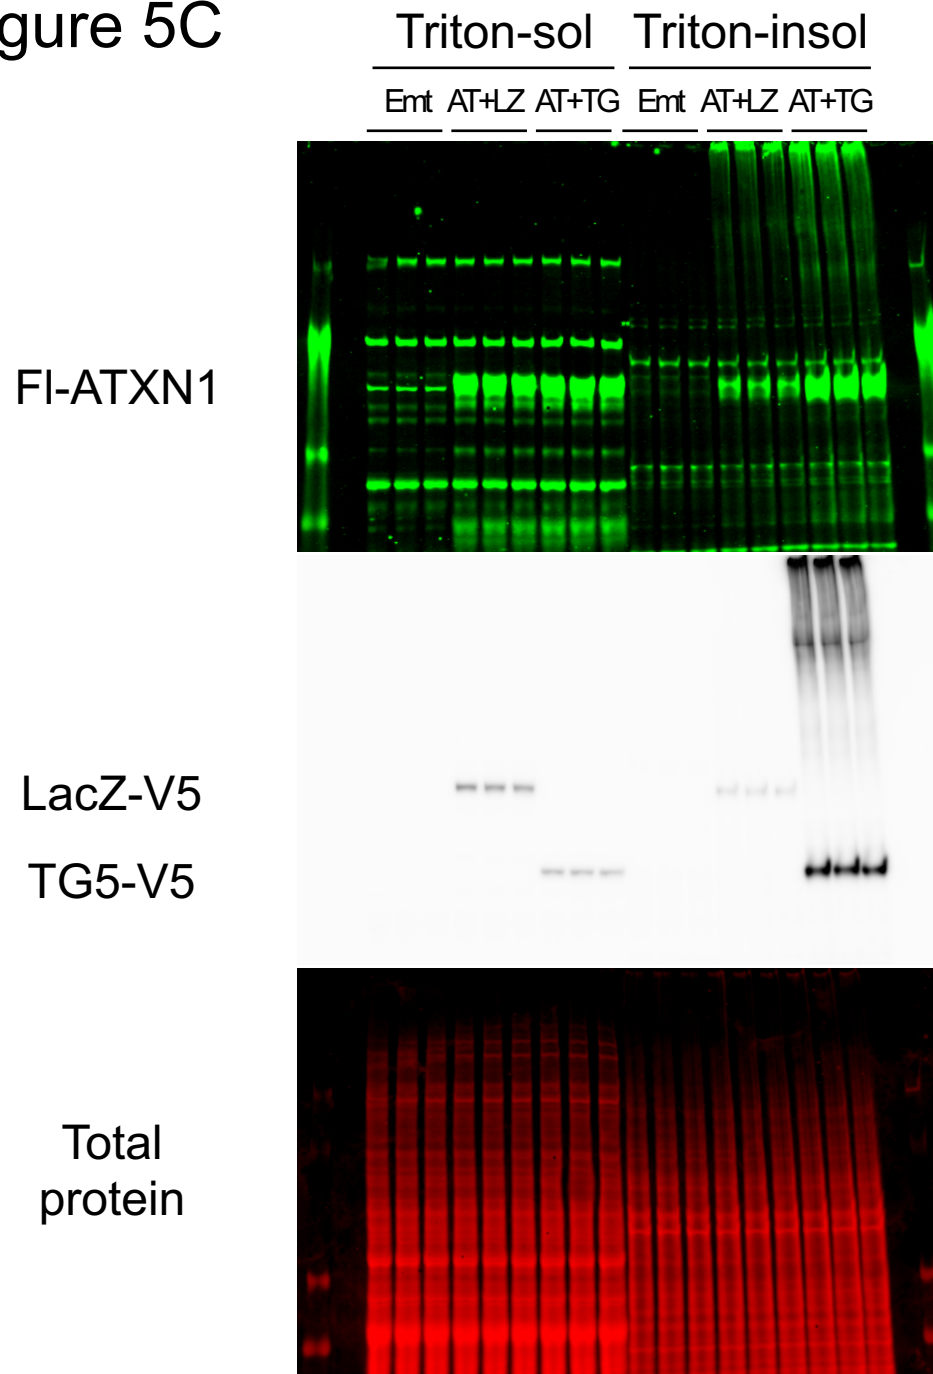

Figure 5D

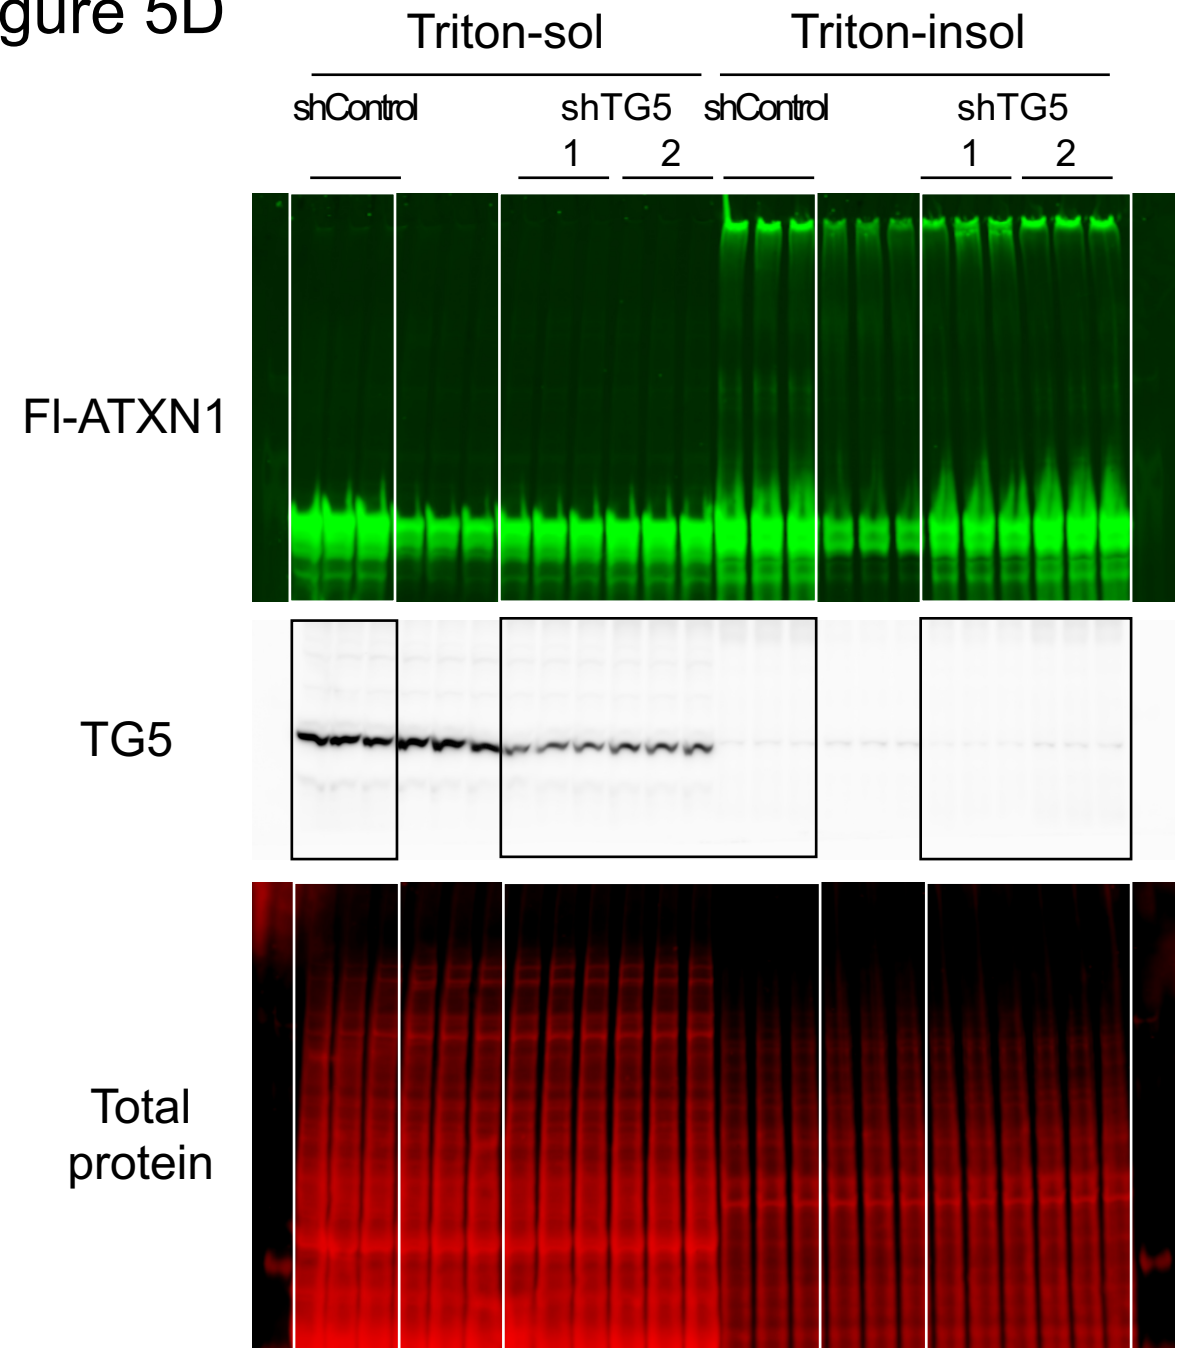

Figure 5E

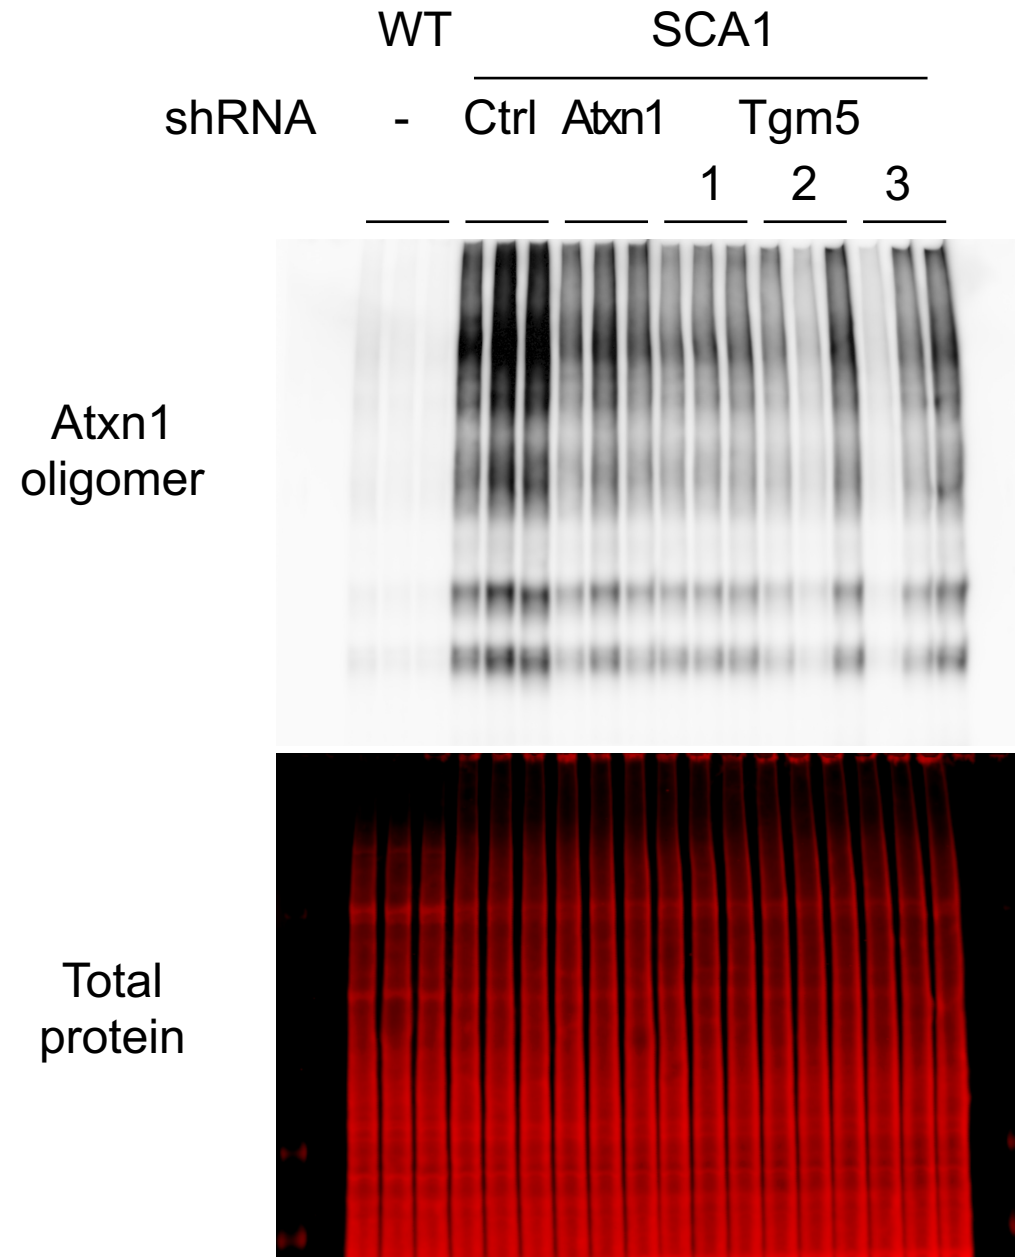

Figure 6A

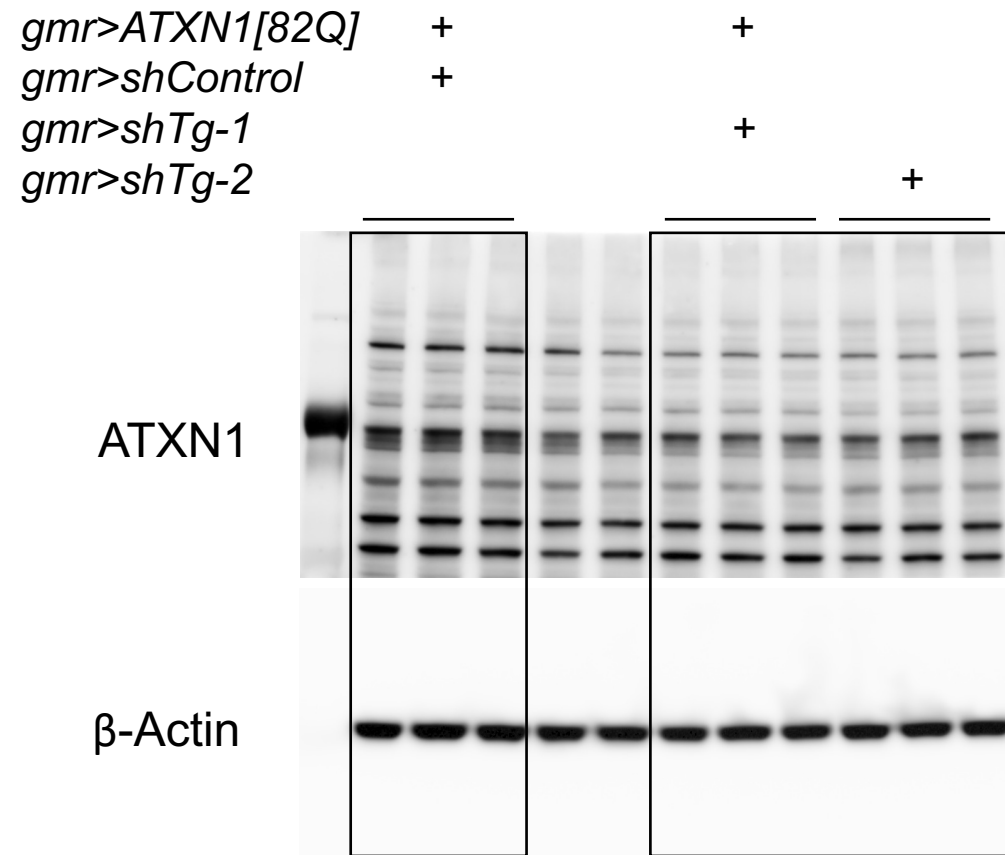

Figure 6B

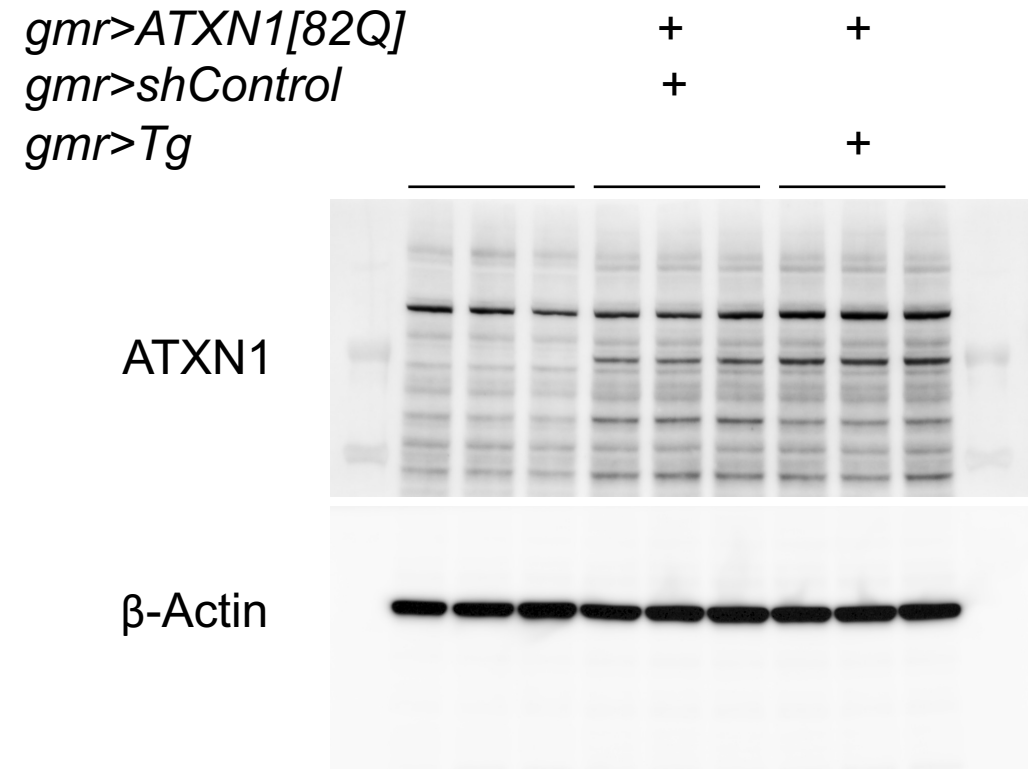



Supplemental Figure 2

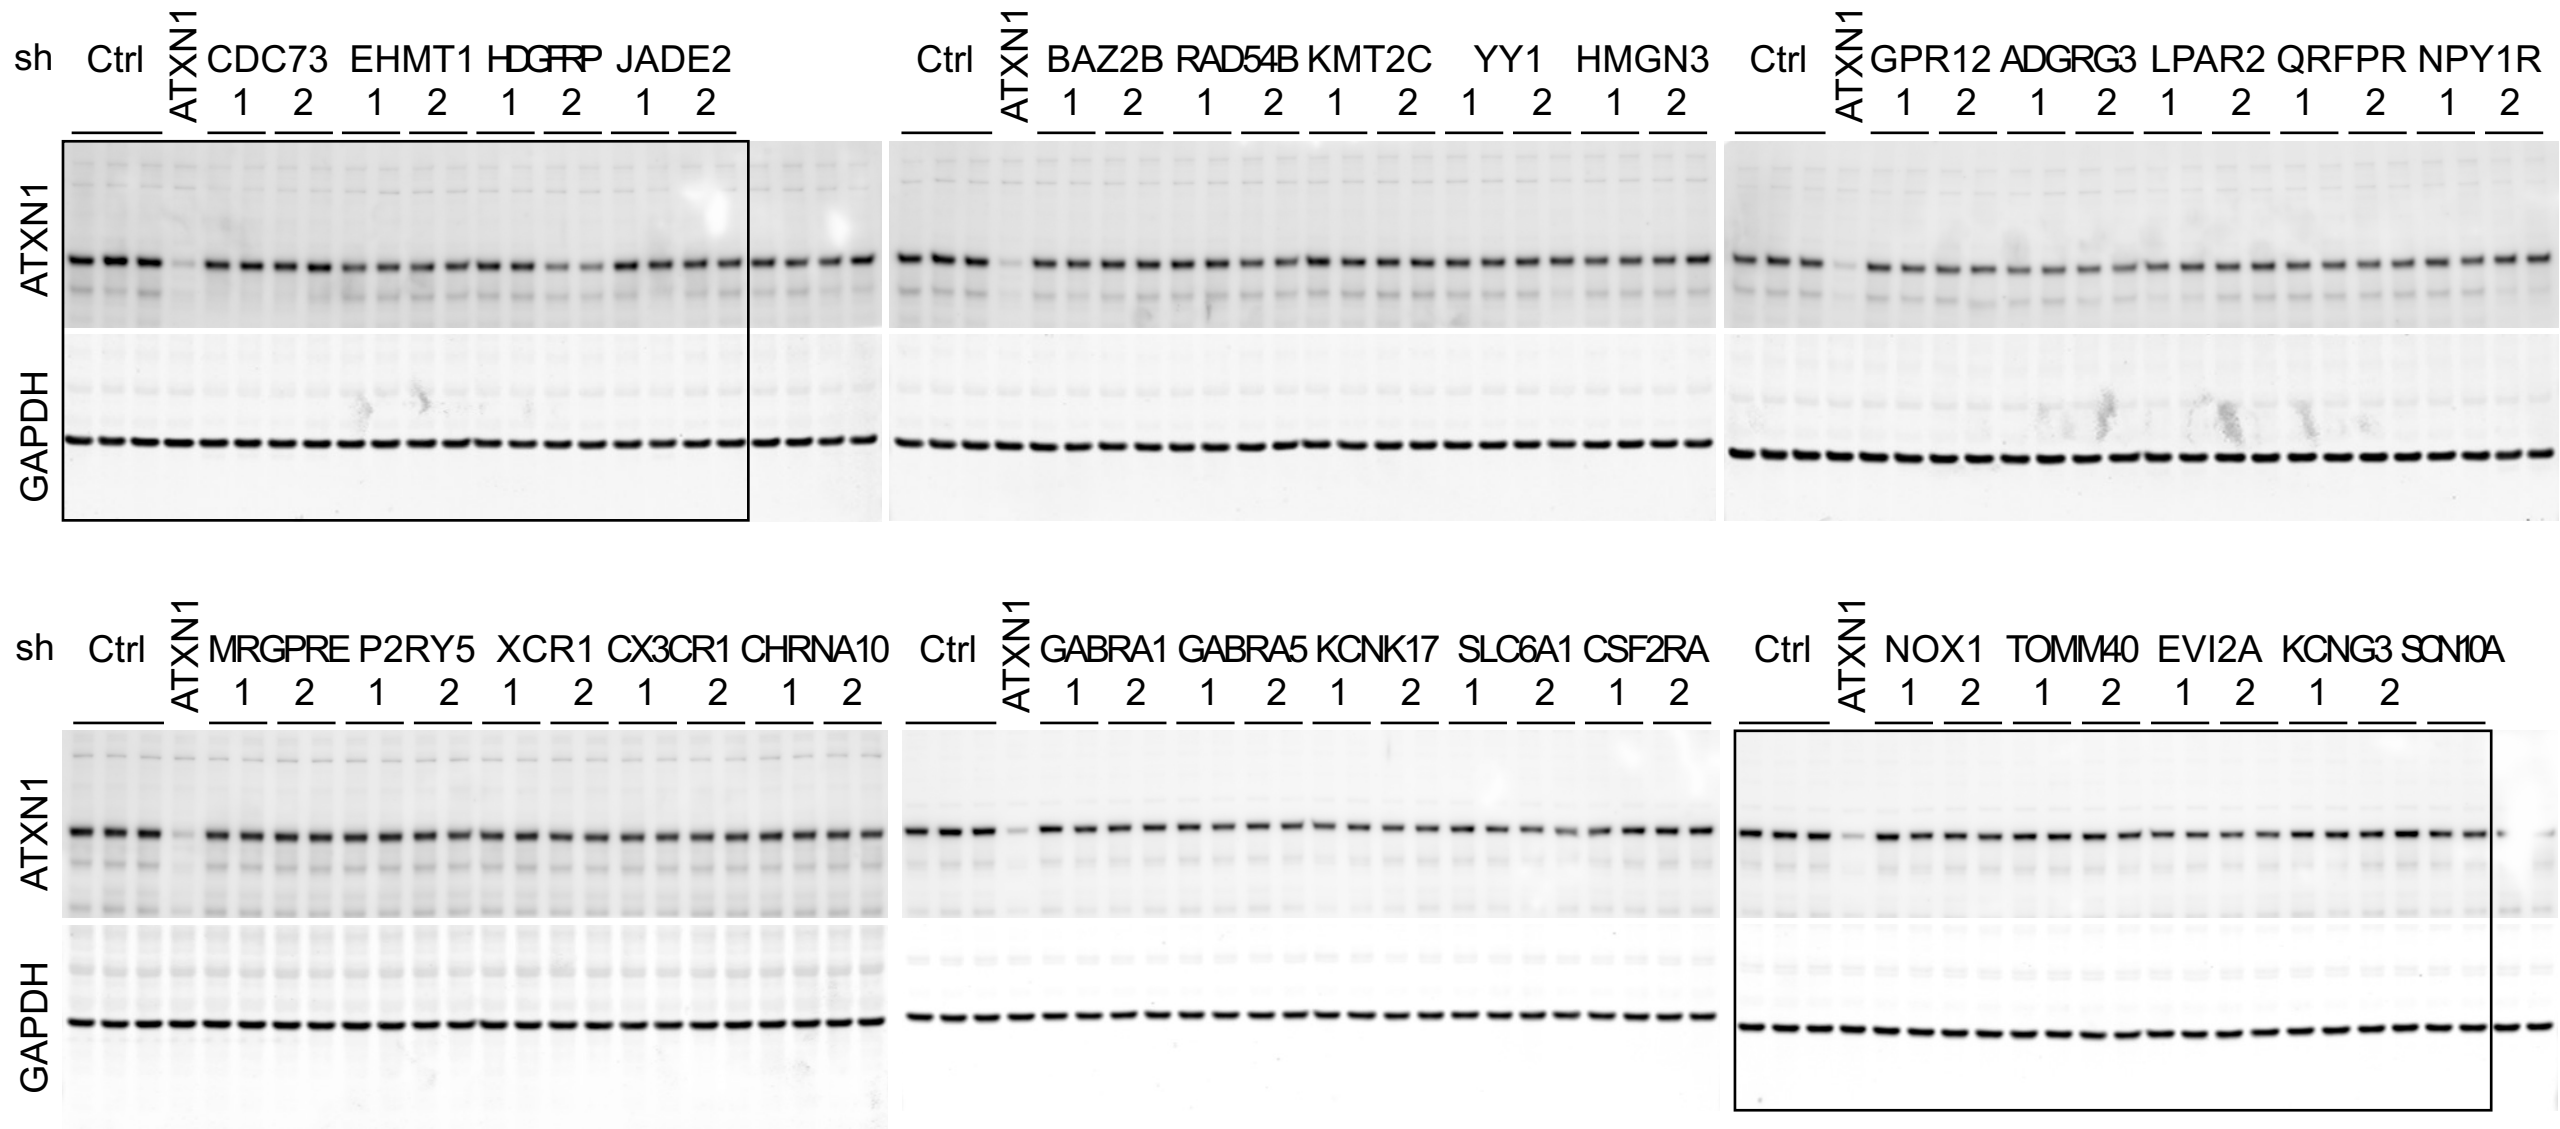

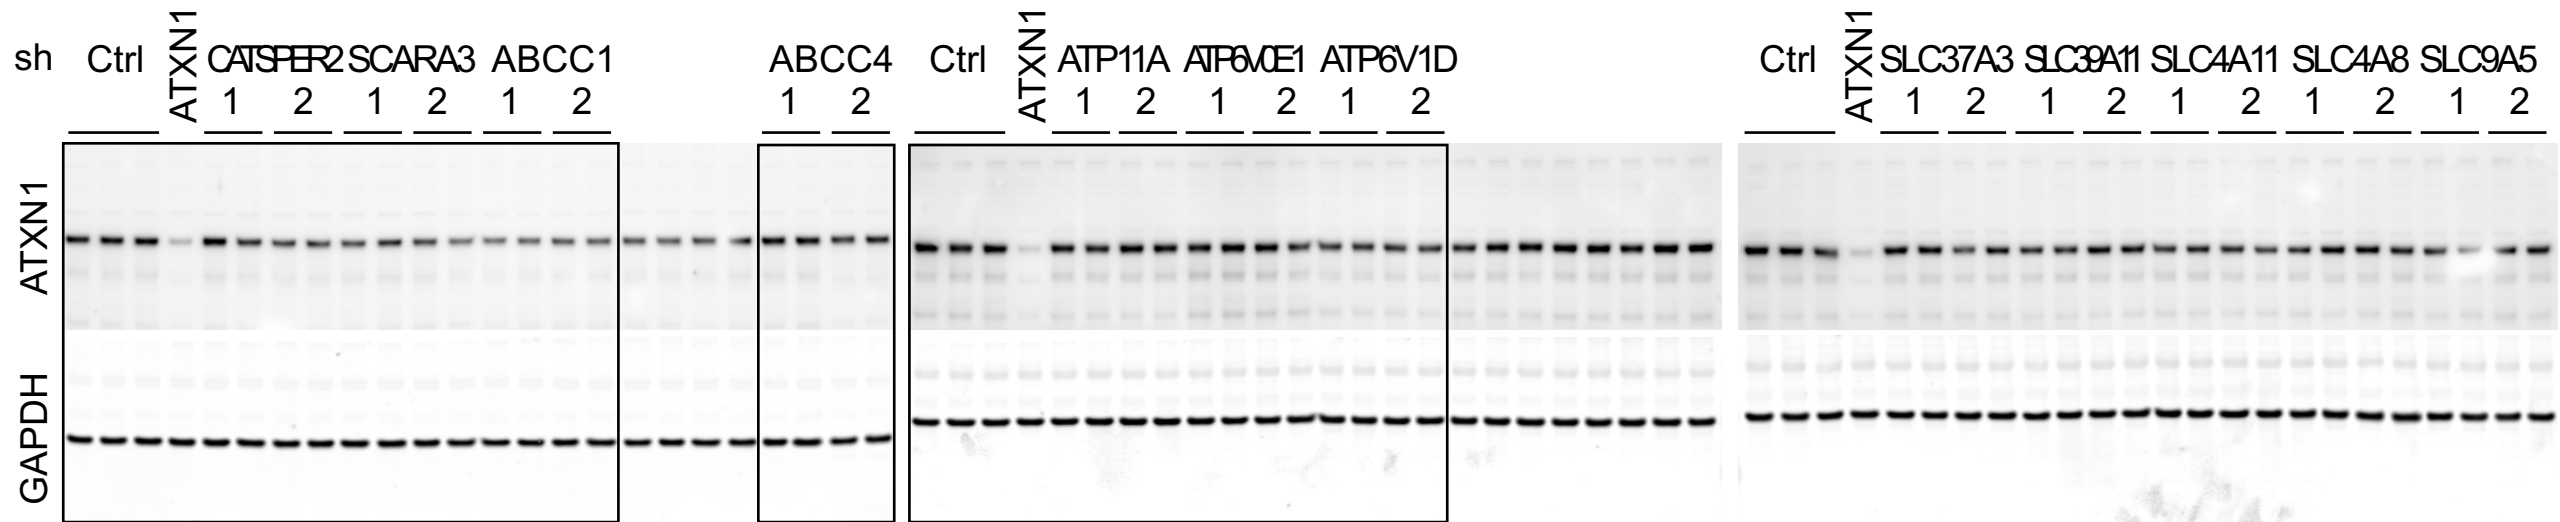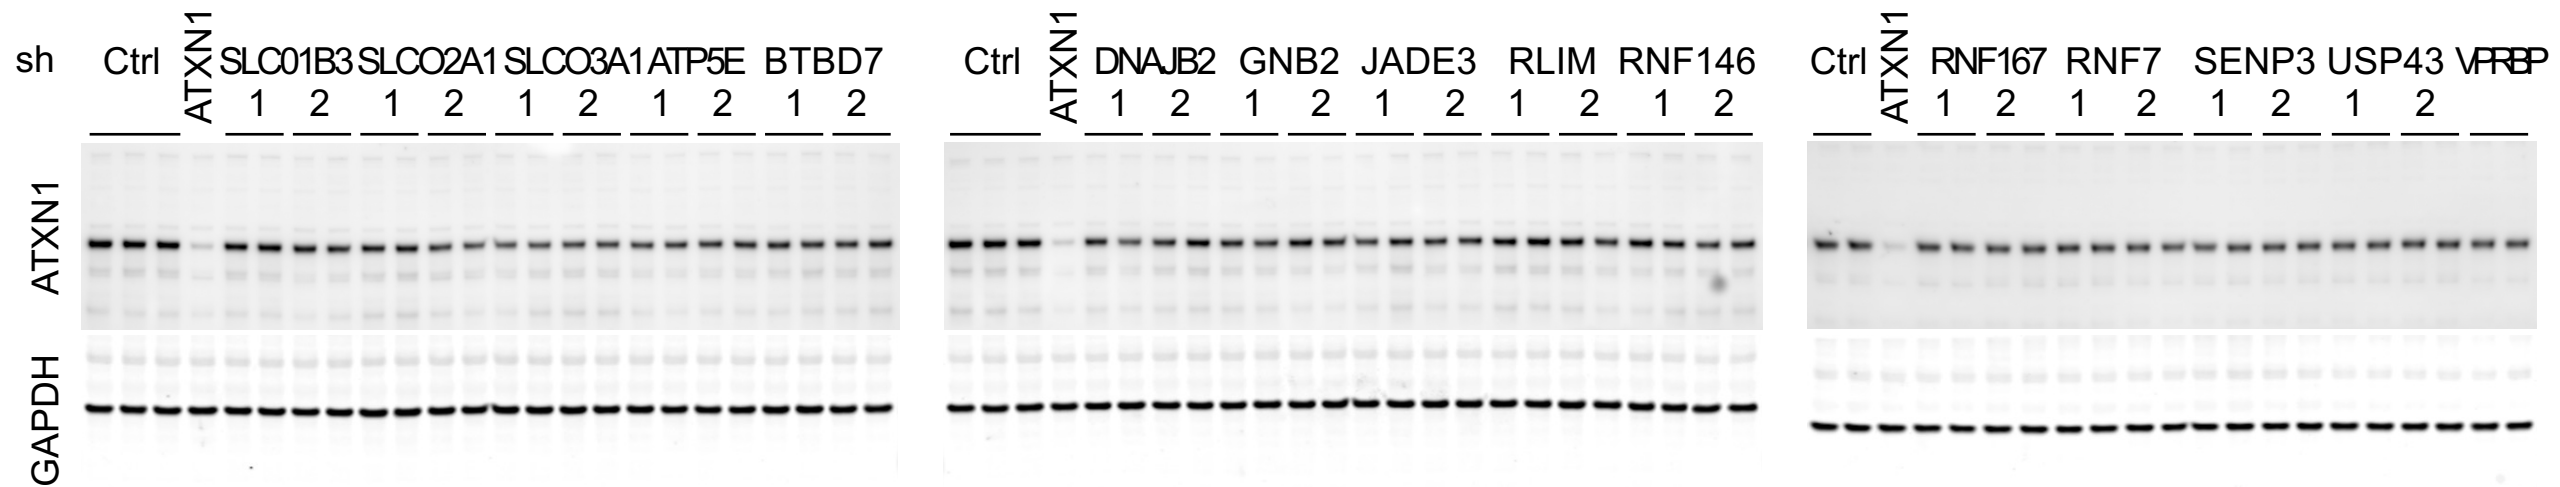

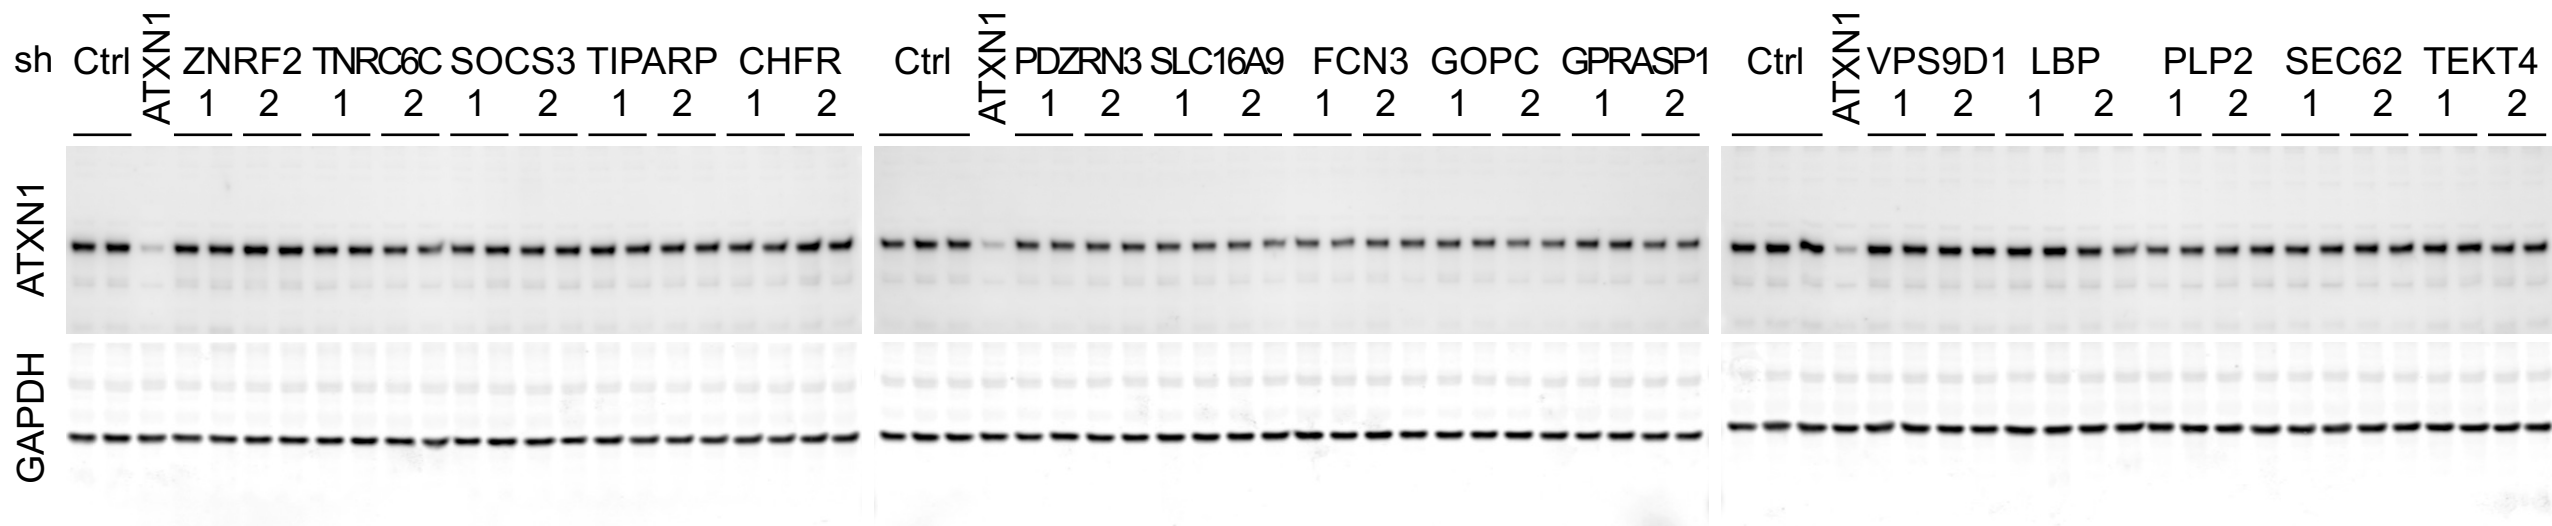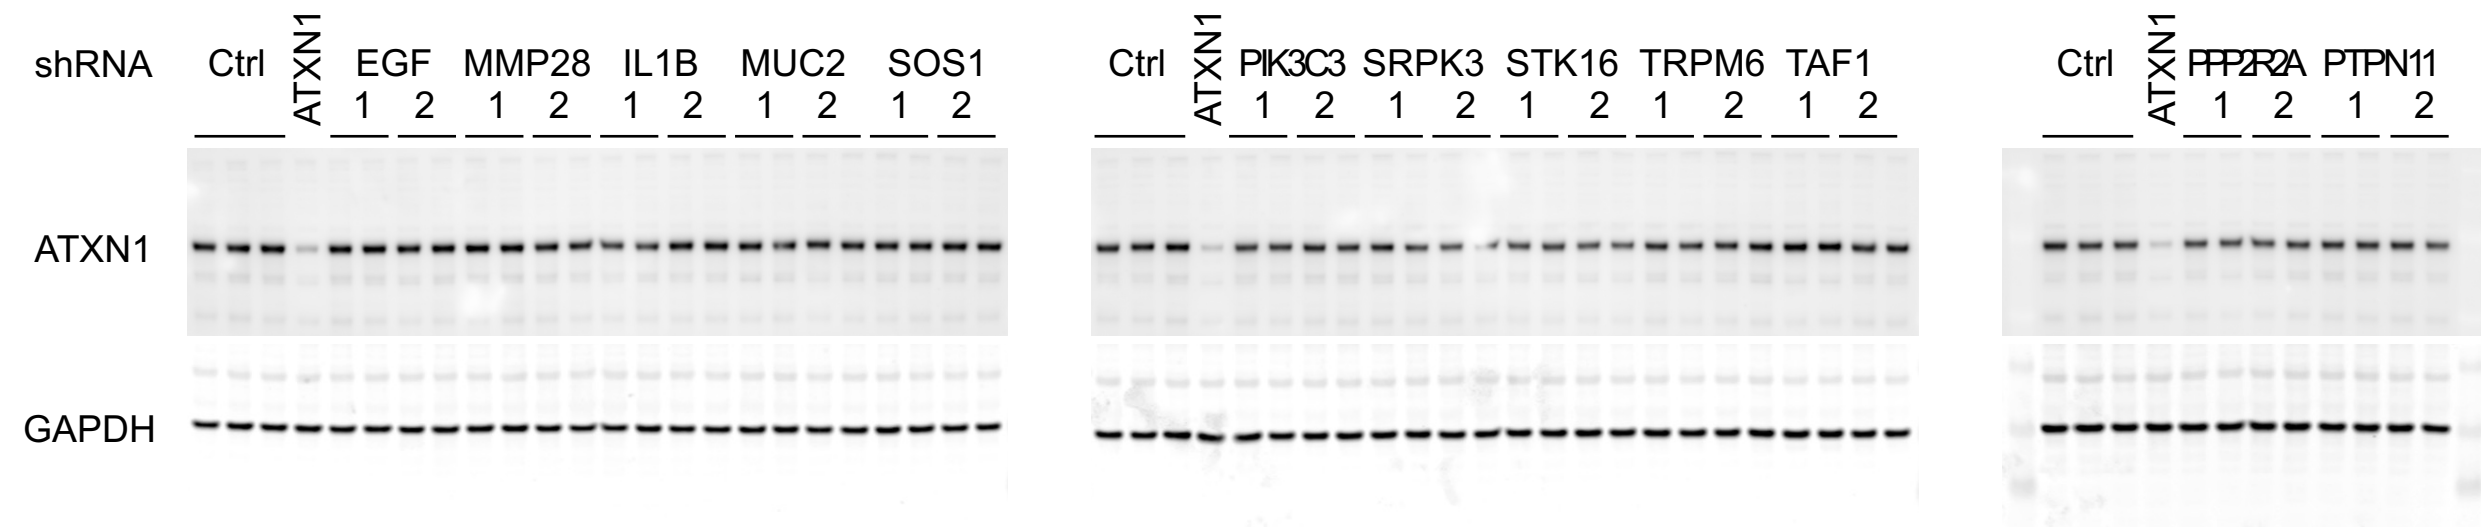

Supplemental Figure 3

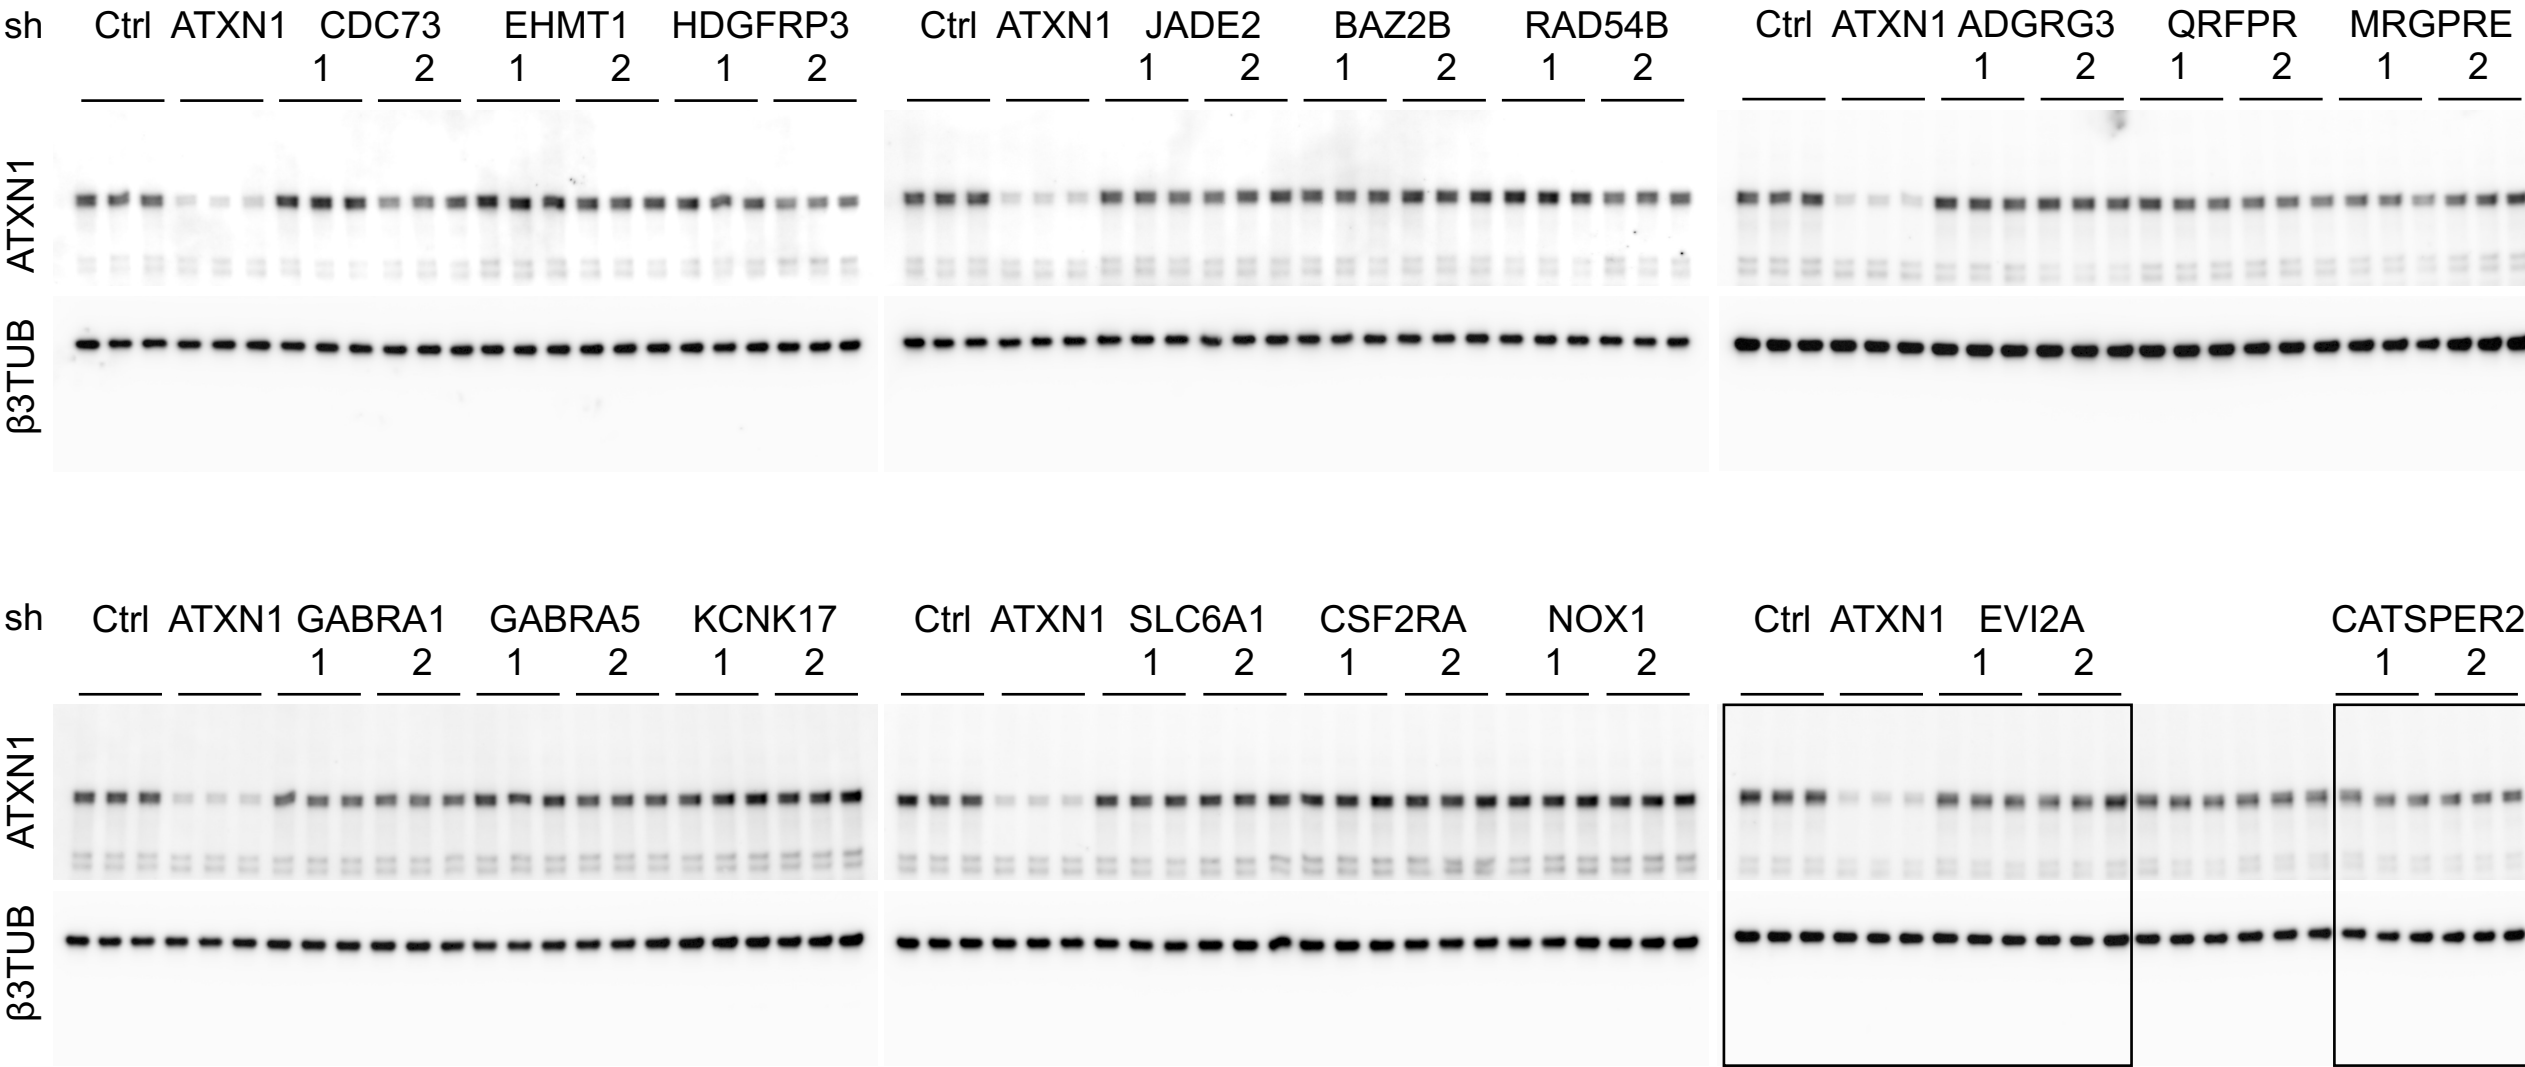

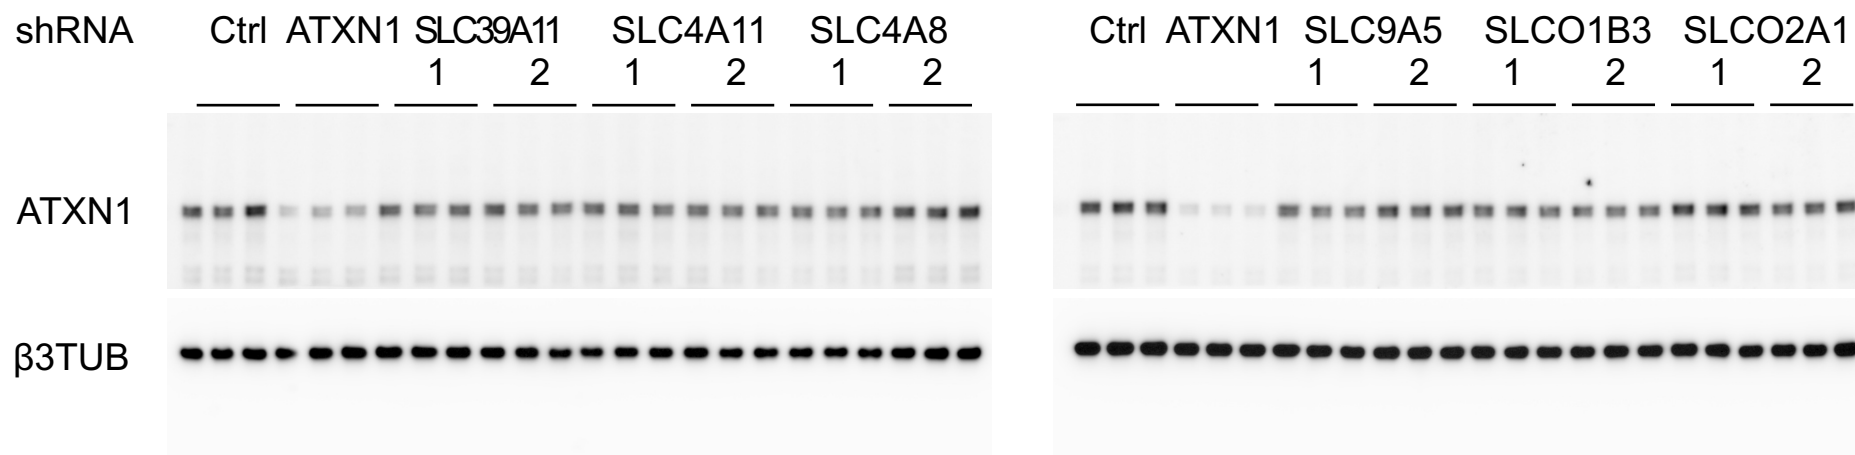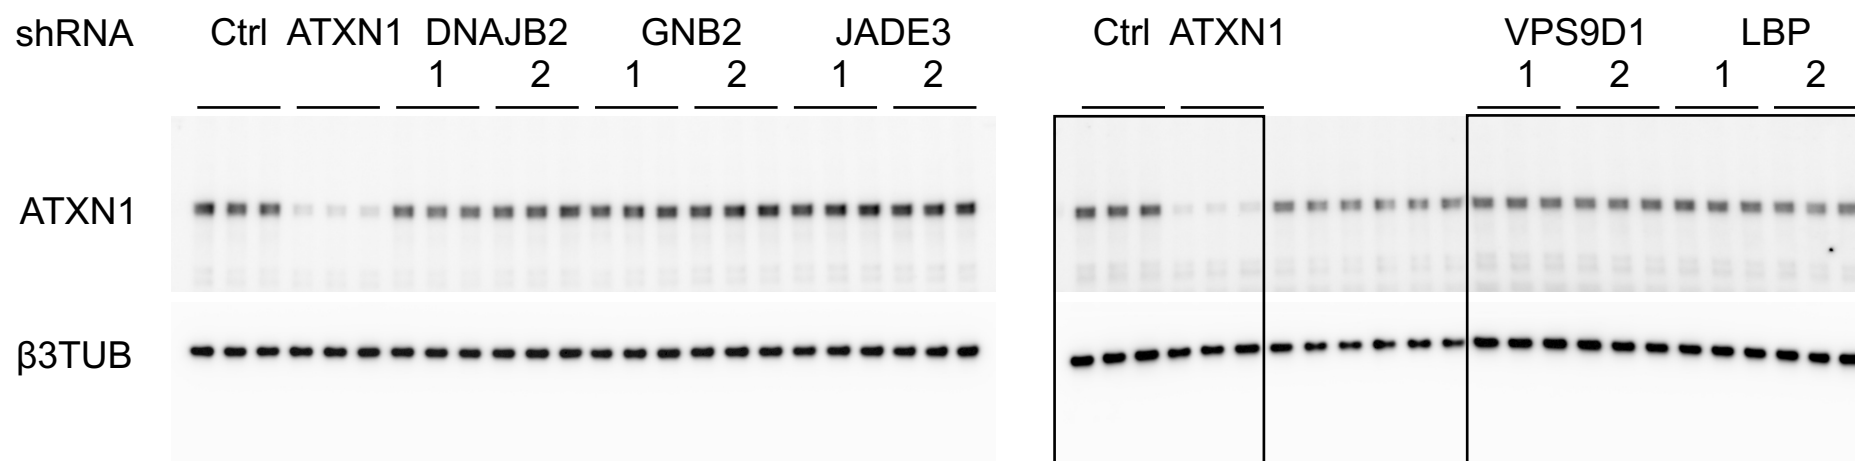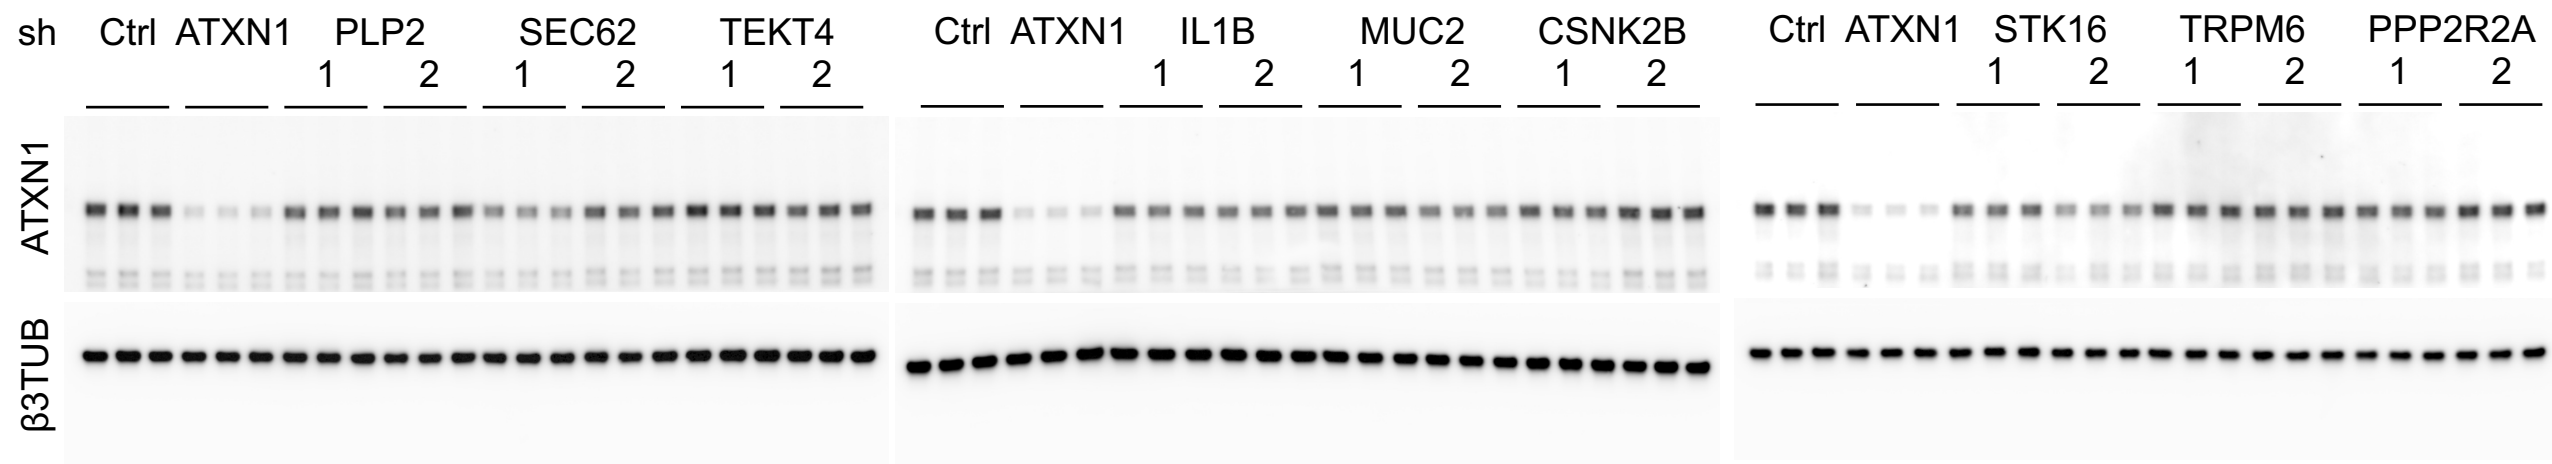

# Supplemental Figure 5

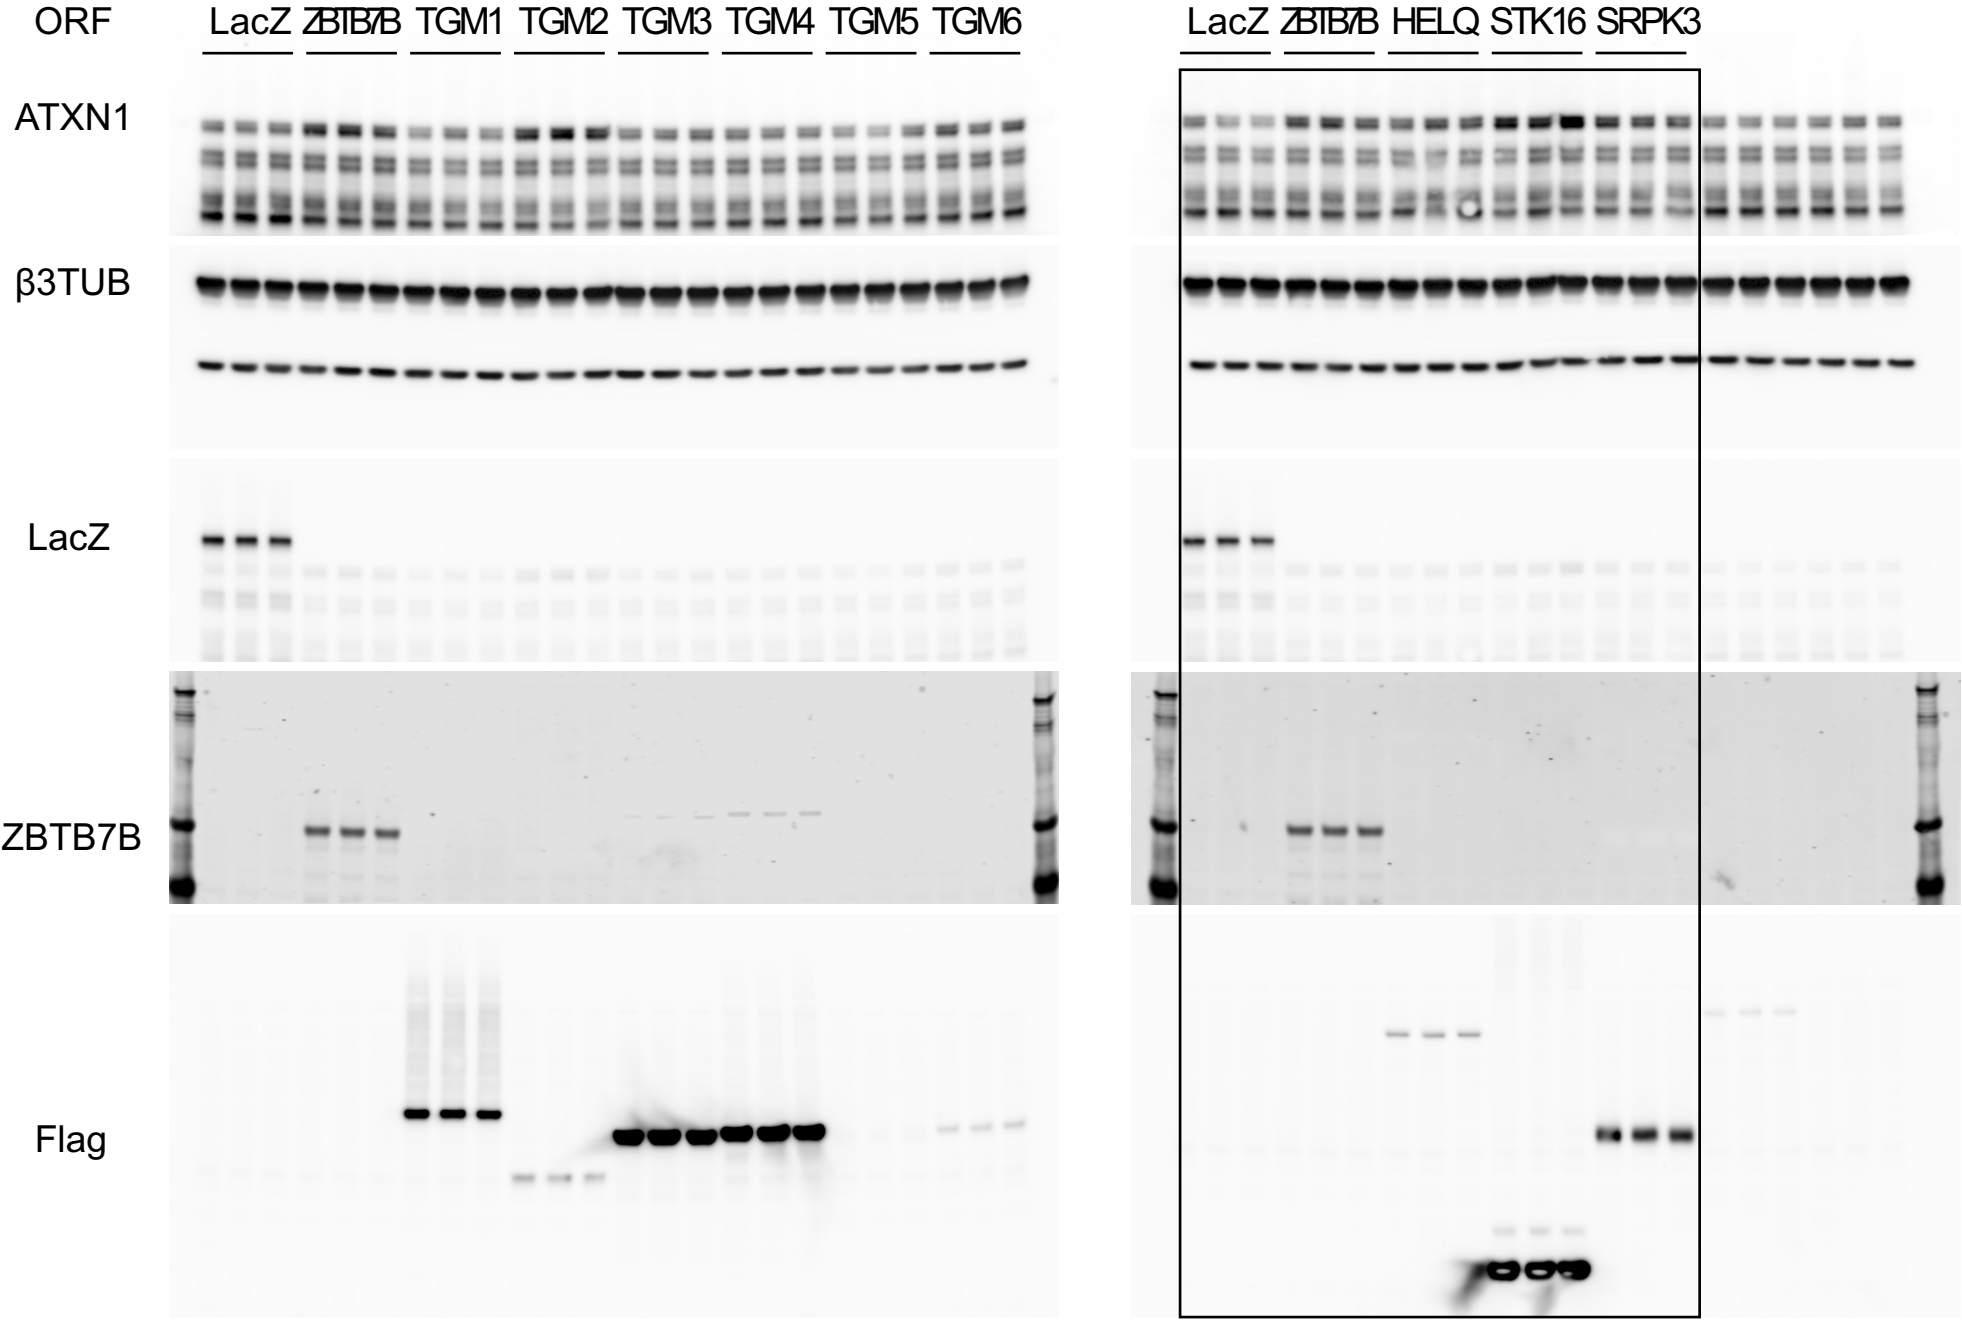

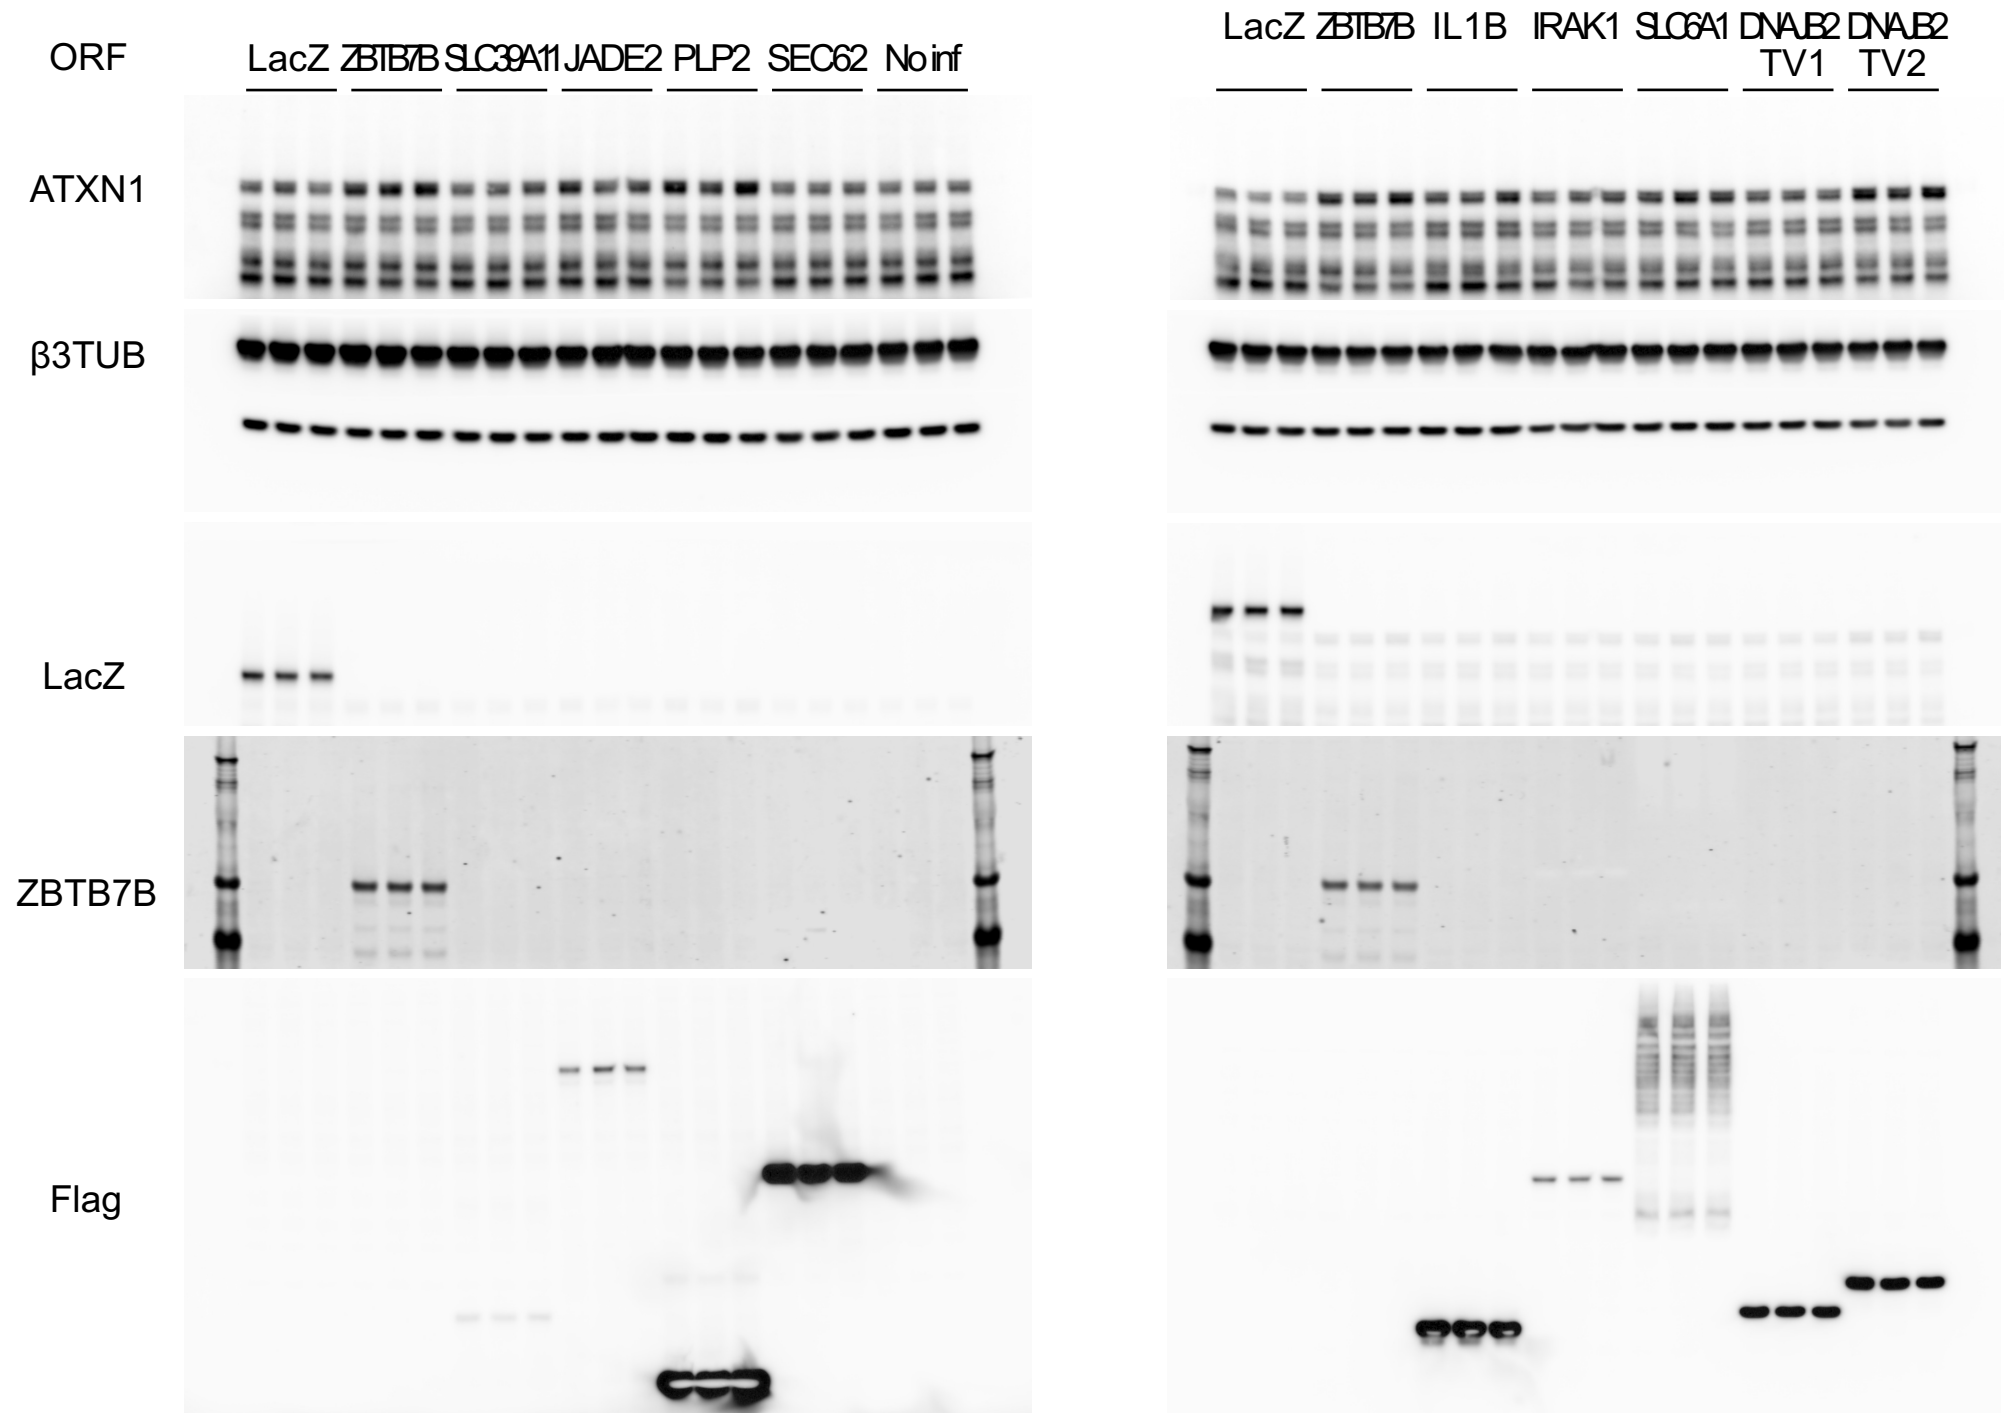

Supplemental Figure 6A

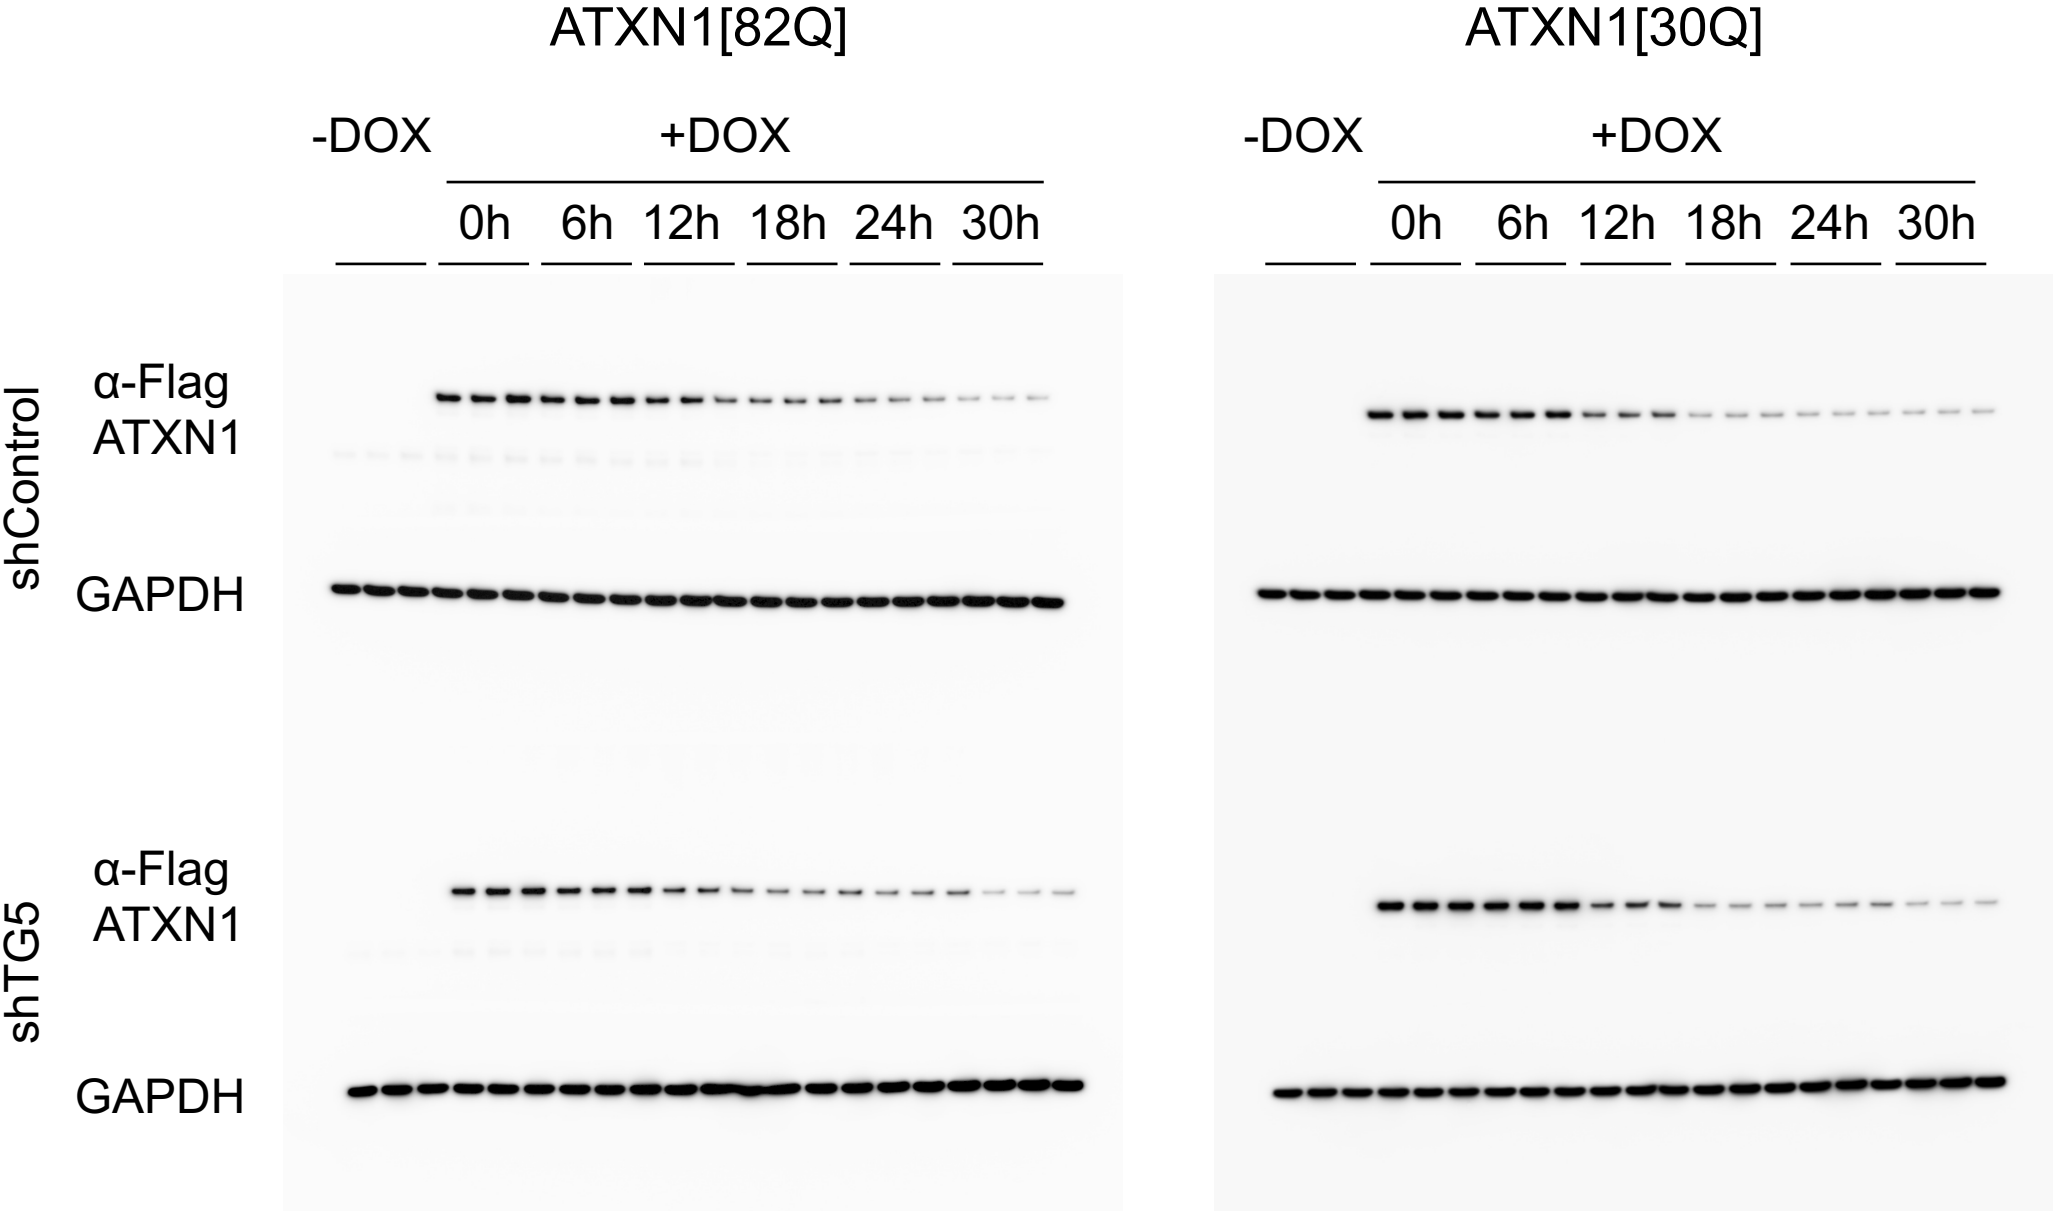



# ATXN1[2Q]

-DOX                      +DOX  
                                  0h   6h 12h 18h 24h 30h

shControl  
 α-Flag  
 ATXN1  
 GAPDH

shTG5  
 α-Flag  
 ATXN1  
 GAPDH

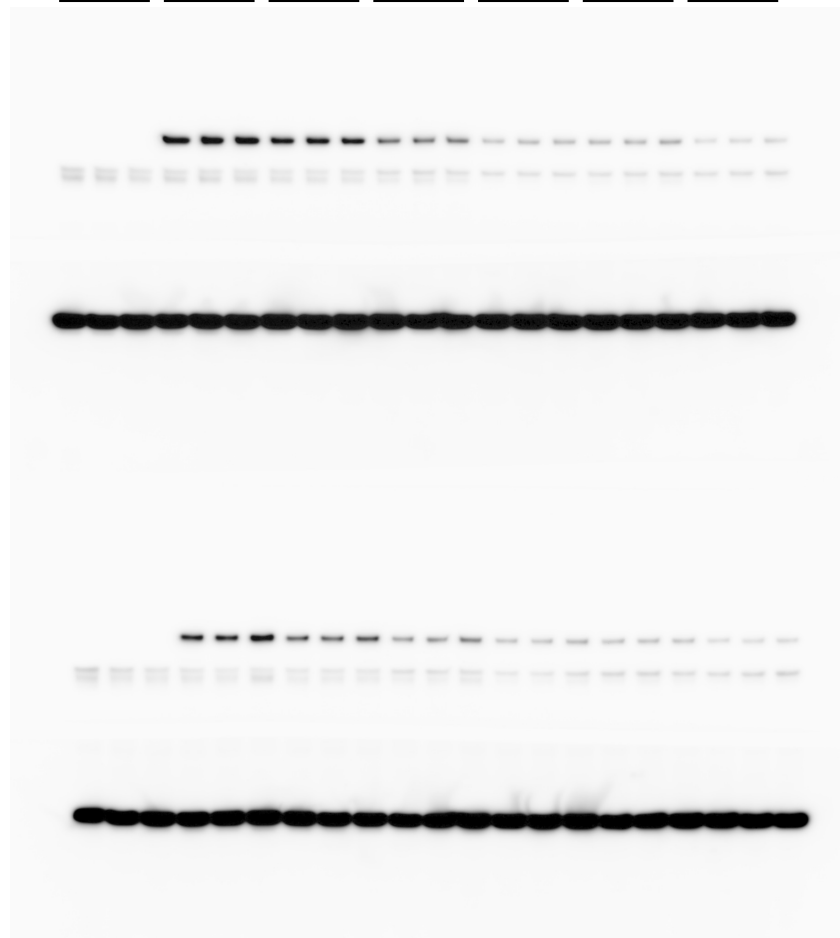

## Supplemental Figure 6C

FI-ATXN1

LacZ-V5

TG2-V5

Total  
protein

Triton-sol    Triton-insol  
                  Emt   AT+LZ   AT+TG   Emt   AT+LZ   AT+TG

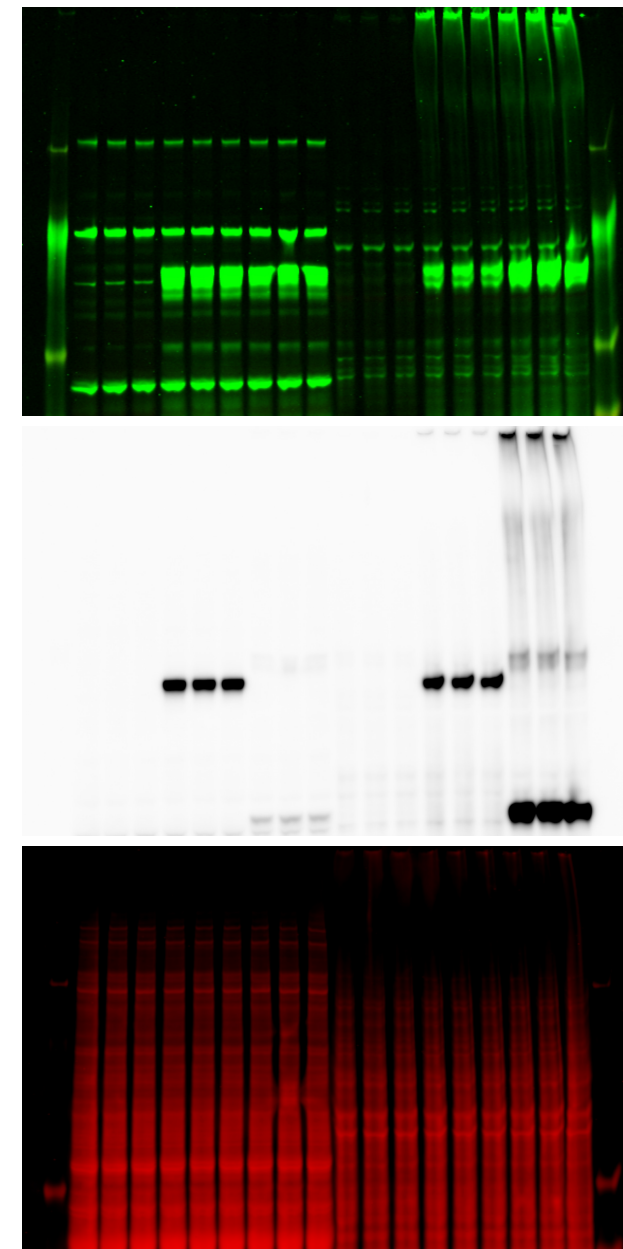

Supplement: sd1 [file 1]
